# Supplementary material
Source: PubMed Central journal article supplement (PMC6655551)
Supplement: NIHMS1030325-supplement-1.pdf [file NIHMS1030325-supplement-1.pdf]

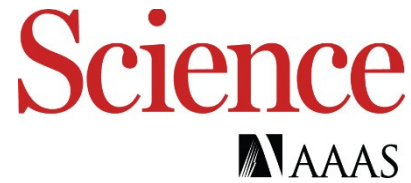

## Supplementary Materials for

### **WDFY4 is required for cross-presentation in response to viral and tumor antigens**

Derek J. Theisen<sup>1†</sup>, Jesse T. Davidson IV<sup>1,2†</sup>, Carlos G. Briseño<sup>1</sup>, Marco Gargaro<sup>3</sup>, Elvin J. Lauron<sup>4</sup>, Qiuling Wang<sup>5</sup>, Pritesh Desai<sup>1,5</sup>, Vivek Durai<sup>1</sup>, Prachi Bagadia<sup>1</sup>, Joshua R. Brickner<sup>1</sup>, Wandy L. Beatty<sup>5</sup>, Herbert W. Virgin<sup>1</sup>, William E. Gillanders<sup>2,6</sup>, Nima Mosammaparast<sup>1</sup>, Michael S. Diamond<sup>1,5,7,8</sup>, L. David Sibley<sup>5</sup>, Wayne Yokoyama<sup>4</sup>, Robert D. Schreiber<sup>1,8</sup>, Theresa L. Murphy<sup>1</sup>, Kenneth M. Murphy<sup>1,9\*</sup>

Correspondence to: [kmurphy@wustl.edu](mailto:kmurphy@wustl.edu)

#### **This PDF file includes:**

Materials and Methods  
Figs. S1 to S15  
Tables S1 to S6

## Materials and Methods

### Mice

All mice were bred and maintained in specific pathogen-free facilities according to institutional guideline protocols approved by the Animal Studies Committee of Washington University in St. Louis. WT C57BL/6 (WT), C57BL/6-Tg(Tcr $\alpha$ Tcr $\beta$ )1100Mb/J (OT-I), C57BL/6-Tg(Tcr $\alpha$ Tcr $\beta$ )425Cbn/J (OT-II) were purchased from The Jackson Laboratory. C57BL/6NF-*Wdfy4*<sup>em1(IMPC)*J*</sup>/J (Stock no. 029334) were generated through the KOMP<sup>2</sup> project at The Jackson Laboratory. MHCII TKO mice (K<sup>b-/-</sup>D<sup>b-/-</sup> $\beta$ 2m<sup>-/-</sup>) were originally provided by H.W. Virgin and T. Hansen (Washington University, St. Louis, MO (74)). 4-14 week old mice that were age and sex matched were used for all experiments. For bone marrow chimeras B6.SJL (B6.SJL-PtprcaPepcb/BoyJ) were purchased from Charles River Laboratories. Chimeras were generated by lethally irradiating mice and injecting them with 4-6 million bone marrow cells i.v. Genotyping primers for *Wdfy4*<sup>em1(IMPC)*J*</sup>/J are a: TTCTGCAGCAGGACAGACAC, b: TTTAGGAGCAGGTTGCCATC, c: ATGCCCTCTCCCAACTTCT. For bone marrow chimeras B6-Ly5.1/Cr (Charles River) mice were  $\gamma$ -irradiated with 1050rad and allowed to recover one day before i.v. injection of 50/50 mixes of *Wdfy4*<sup>+/+</sup>/*Batf3*<sup>-/-</sup> or *Wdfy4*<sup>-/-</sup>/*Batf3*<sup>-/-</sup> bone marrow. Mice rested for eight weeks post bone marrow injection before use in tumor experiments.

### Antibodies and Flow Cytometry

Flow cytometry and cell sorting were completed on a FACS CantoII or FACS Aria Fusion instrument (BD) and analyzed using FlowJo analysis software (Tree Star). Staining was performed at 4°C in the presence of Fc block (2.4G2; BD) in magnetic-activated cell-sorting

(MACS) buffer (PBS + .5% BSA + 2mM EDTA). The Following antibodies were used. From BD Biosciences: CD117 (2B8), CD135 (A2F10.1), Ly6C (AL-21), MHCI (AF6-88.5), CD4 (RM4-5), CD8 $\alpha$  (53-6.7), CD11b (M1/70), B220 (RA3-6B2), CD64 (X54-5/7.1), CD19 (1D3), CD95 (Jo2), CD3 (145-2C11), CD45 (30-F11); from Tonbo Biosciences: MHCII (M5/114.15.2), CD44 (IM7), CD45.1 (A20), CD45.2 (104), CD11c (N418); from Biolegend: CD103 (2E7), XCR1 (ZET), CD115 (AFS98), Ter119 (Ter-119), Ly6G (1A8), TCR $\beta$  (H57-597), GL-7 (GL7), CXCR5 (L138D7), PD-1 (29F.1A12), CD3 (145-2C11), CD8 (53-6.7), CD4 (RMA4-5), CD44 (IM7), CD16/32 (93) ; from eBiosciences: TCRV $\alpha$ 2 (B20.1), CD90.1 (HIS51), CD90.2 (53-2.1), IL-12p40 (C17.8), F4/80 (BM8), SIINFEKL/H-2K<sup>b</sup> (25-D1.16), CD317 (eBio927); from Invitrogen: CD172 $\alpha$  (P84), TNF $\alpha$  (MP6-XT22), CD45 (30F11), IgD (11-26c).

For immunofluorescence, the following antibody was purchased from Invitrogen: Alexa Fluor 488 goat anti-mouse IgG (H+L). Anti-Rab43 (2E6) was produced in house as described previously (32). From abcam: anti-SQSTM1 (ab56416), anti-Rab7 (ab50533), anti-Lamp1(ab24170), anti- $\beta$ 2m (ab75853), anti-calnexin (ab22595), anti-EEA1 (ab2900). From Santa Cruz: anti-Tap1 (B-8). From IBA Lifesciences: StrepMAB-Classic.

H-2K<sup>b</sup>-TSYKFESV tetramers were produced in the Immunomonitoring Laboratory within the Center for Human Immunology and Immunotherapy Programs (Washington University). West Nile tetramers: D<sup>b</sup>-WNV NS4B, I-A<sup>b</sup>-WNV E 641-655, I-A<sup>b</sup>-WNV NS3 372-386, I-A<sup>b</sup>-WNV NS3 111-125 were generated by the NIH Tetramer Core Facility.

### Cell sorting

Splenic and Flt3L DCs were sorted as B220<sup>-</sup>MHCII<sup>+</sup>CD11c<sup>+</sup>CD24<sup>+</sup>CD172a<sup>-</sup> (cDC1) and B220<sup>-</sup>MHCII<sup>+</sup>CD11c<sup>+</sup>CD24<sup>-</sup>CD172a<sup>+</sup> (cDC2). Monocytes were sorted from the bone marrow as Ly6G<sup>-</sup>CD19<sup>-</sup>Ter119<sup>-</sup>CD11c<sup>-</sup>CD115<sup>+</sup>CD117<sup>-</sup>Ly6C<sup>+</sup>CD11b<sup>+</sup>. OT-1 cells were sorted from the spleen as B220<sup>-</sup>CD11c<sup>-</sup>CD4<sup>-</sup>CD8<sup>+</sup>CD45.1<sup>+</sup>Vα2<sup>+</sup>. OT-II cells were sorted from the spleen as B220<sup>-</sup>CD11c<sup>-</sup>CD8<sup>-</sup>CD4<sup>+</sup>CD45.1<sup>+</sup>Vα2<sup>+</sup>. Infected DCs for CRISPR screen were sorted as CD90.1<sup>+</sup>. Splenic B cells were sorted as B220<sup>+</sup>Thy1.2<sup>-</sup>CD11c<sup>-</sup>.

### DC Preparation

To harvest DCs from lymphoid tissues, organs were digested in 250μg/ml collagenase B (Roche) and 30 U/ml DNase I (Sigma-Aldrich) for 30-60min at 37°C with stirring in complete IMDM + 10% FCS (I10F). Erythrocytes (RBCs) were lysed using ACK lysis buffer (150mM ammonium chloride, 10mM potassium bicarbonate, and .1mM EDTA). Before sorting DCs were enriched using CD11c microbeads (Miltenyi Biotech). For peripheral tissue DCs, organs were digested with collagenase D (Roche) and DNaseI (Sigma-Aldrich) for 1hr at 37°C with stirring in 5ml cIMDM.

### BM culture with Flt3L

Tibias, femurs, and hips from mice were crushed into MACS buffer and RBCs were removed with ACK lysis buffer. BM cells were cultured at 2x10<sup>6</sup> cells/ml in cIMDM containing 5% FLT3L for 8-10 days. Loosely adherent cells were harvested for analysis.

### moDC preparation

Tibias, femurs , and hips were crushed into macs buffer and depleted of B220<sup>+</sup> and Ly6G<sup>+</sup> cells using MagniSort streptavidin beads (Thermo Fisher). Sorted monocytes were cultured in 2ml I10F with 20ng/ml GM-CSF and 20ng/ml IL-4 (Peprotech) for 4 days. Loosely adherent cells were harvested for analysis

### sgRNA vector design

The ires-GFP fragment from the MSCV-ires-GFP retrovirus vector was replaced with Thy1.1 cDNA from MSCV-ires-Thy1.1 retrovirus vector (75) using Xho1 and EcoR1 digests to produce Thy1.1- RV. Two PCR DNA fragments containing the hU6 promoter and gRNA scaffold from pSpCas9(BB)-2A-GFP (PX458) (a gift from Feng Zhang (Addgene plasmid #48138) (76)) and a Bbs1 stuffer fragment from pLentiCrisprV1, provided by Feng Zhang (Addgene plasmid #49535) were sequentially cloned into the T easy vector (Promega). An EcoR1 fragment from the resulting plasmid was cloned into the EcoR1 site of Thy1.1-RV to produce Thy1.1-hU6-gRNA-Bbs1 stuffer-RV. To produce retroviral guide plasmids, annealed oligonucleotides with Bbs1 compatible overhangs and containing guide target sequences as described (77) were ligated into Bbs1 digested Thy1.1-hU6-gRNA-Bbs1 stuffer-RV.

### Antigen presentation assays

*In vivo* cross-presentation assays were performed as described previously (8). MHC1 TKO splenocytes were osmotically loaded with 10mg/ml soluble ovalbumin (Worthington Biochemical Corporation), irradiated at 1350rad, and 500,000 cells were injected i.v. into mice that had been injected with 500,000 CFSE-labeled OT-I T cells one day prior. After 3 days, spleens were harvested, mashed, and analyzed for CFSE dilution of OT-I cells. *In vitro* cross-

presentation assays were performed using 10,000 sorted cDCs and 25,000 CFSE-labeled OT-I cells co-cultured for 3 days before analysis of CFSE dilution.

HKLM-OVA (a gift from H. Shen, University of Pennsylvania, Philadelphia, PA) and soluble OVA were prepared as described previously (32), OVA-loaded splenocytes were prepared as described above. Bm1 T OVA cells (72) (a gift from C. Reis e Sousa, Francis Crick Institute, London, UK) were UVC irradiated with 240mJ/cm<sup>2</sup> one day prior to plating with sorted cDCs and OT-1.

For direct-presentation assays, cDC1 and cDC2 were sorted from day 10 Flt3L cultures as described above. Cells were then osmotically loaded with 10mg/ml soluble ovalbumin (Worthington Biochemical Corporation) and co-cultured for 3 days with CFSE-labeled OT-I cells. For alternative direct presentation bone marrow was infected with viruses containing an empty vector or an OVA expression plasmid before culturing in Flt3L to generate DCs. 7 days after infection cDC1 and cDC2 were either stained for K<sup>b</sup>-SIINFEKL complexes (25-D1.16) or cultured with CFSE-labeled OT-1 T cells for 3 days and assayed for T cell proliferation.

For B cell antigen presentation assays, B cells were sorted from spleens as described above. 50K B cells were then co-cultured for 3 days with CFSE-labeled OT-II cells and 100µg/ml soluble ovalbumin (Worthington Biochemical Corporation) with or without 1µg/ml LPS from *Escherichia coli* (O55:B5; Sigma-Aldrich).

For FACS of K<sup>b</sup>-SIINFEKL, Day 8 Flt3L cultured DCs were cultured for 48 additional hours with either 0.1mg/ml soluble OVA or 1x10<sup>6</sup> OVA-loaded irradiated splenocytes prepared as described above.

#### Cross-presentation screen

Retroviral vectors were transfected into Platinum-E cells as described (78) and supernatant containing virus was collected after 2 days. Sorted Lin<sup>-</sup>cKIT<sup>hi</sup> cells from the bone marrow of Cas9-expressing mice (a gift from Feng Zhang (45)) were infected with viral supernatants with 2µg/ml polybrene at 2,250r.p.m. for at least 1hr. Cells were then grown in Flt3L culture for 7 days before sorting for Thy1.1<sup>+</sup> cells. Sorted cells were then diluted to a concentration of ~10K cells per well and cocultured with 10<sup>7</sup> HKLM-OVA and 25K CFSE-labeled OT-I T cells for 3 days before analysis for CFSE dilution.

#### DC turnover assay

Mice were injected daily with 1mg BrdU and spleens were harvested on days 2, 4, and 6 for flow cytometry. Spleens were digested as described above and then fixed and stained according to the BrdU Flow Kit procedure (BD). pDCs were identified as CD11c<sup>low</sup>B220<sup>+</sup>Bst2<sup>+</sup> and B cells were identified as CD11c<sup>-</sup>B220<sup>+</sup>.

#### In vitro TLR Stimulation

200K Flt3L cultured DCs were plated and stimulated with either: 1µg/ml LPS from *Escherichia coli* (O55:B5; Sigma-Aldrich), 50µg/ml PolyI:C (Sigma-Aldrich), 63nM ODN1826, class B CpG oligonucleotide (CpG; InvivoGen), 2.5µg/ml STAg (prepared as previously described (79)) or 10<sup>7</sup> HKLM-OVA (prepared as previously described (32)). Cells were stimulated for 1hr, treated with 1µg/ml brefeldin A (Sigma-Aldrich), and then incubated 4hrs. Cells were washed, prepared for surface staining, fixed in 4% paraformaldehyde (Electron Microscopy Sciences), and then permeabilized with .5% saponin for intracellular staining.

For analysis of CD80/86 expression cells were prepared as described above and incubated with 1µg/ml LPS from *Escherichia coli* (O55:B5; Sigma-Aldrich) before surface staining.

#### DQ-Ovalbumin degradation assay

200K cells from day 9 Flt3L cultures were incubated with either 10µg/ml soluble OVA (Worthington Biochemical Corporation), 10µg/ml DQ-Ovalbumin (Thermo Fisher), or 10µg/ml DQ-OVA + 5µg/ml MG132 (Sigma-Aldrich) for either 5, 15, 30, or 60min. Cells were washed at the indicated timepoints with PBS and surface stained for DC markers before analysis for FITC<sup>+</sup> cells.

#### HKLM phagocytosis assay

1 million cells from day 10 Flt3L cultures were harvested and plated with either  $2 \times 10^8$  AlexaFluor647 (generated as described previously (32)) labeled HKLM-OVA or no antigen at either 4°C or 37°C for 4hrs. After incubation DCs were enriched to remove HKLM using CD45.2-biotin [104] (eBiosciences) and MojoSort separation (BioLegend) and stained for DC markers for flow cytometry.

#### WDFY4 overexpression constructs

The cDNA fragments for 4 individual domains of murine WDFY4 were synthesized as gene blocks (Thermo Fisher). A Twin-Strep® tag was placed at the 5' end of Fragment 1. Silent mutations were introduced in all fragments to remove endogenous BamHI sites. Gene blocks were synthesized with the following 5'/3' restriction enzyme sites: BamHI/AatII (Fragment 1), AatII/BstEII (Fragment 2), BstEII/AgeI (Fragment 3), AgeI/SpeI (Fragment 4). Each gene block



was cloned individually then in sequence into pBluescript (Addgene) and then cloned into MSCV-IRES-Thy1.1 (75) using 5' BglII site and 3' blunt end to produce MSCV-TwinStrep-WDFY4-IRES-Thy1.1 vector.

For proteomics and co-immunoprecipitation experiments, 2XFLAG tagged fragments of domains 1-4 were created using PCR and the above constructs as template. Each fragment was cloned into MSCV-IRES-Thy1.1 using a 5' BglII site and either a 3' SallI site or 3' blunt end.

#### Immunoprecipitation and mass spectrometry

JAWSII cells (ATCC) stably expressing constructs for empty vector or Flag-tagged GFP, FL1, FL2, FL3, or FL4 were grown up to 50-100 million cells and harvested. Cells were lysed using lysis buffer (1% NP-40, 20mM Tris, 127mM NaCl, 10% Glycerol, 2mM EDTA, 1mM EGTA, 50mM NaF) with protease inhibitors for 30min and spun to clear. Cleared lysates were incubated for 3.5hrs with magnetic beads conjugated to an anti-Flag antibody [M2] (Sigma) in Tap wash buffer (50mM Tris, 100mM KCl, 5mM MgCl<sub>2</sub>, .2mM EDTA, 10% Glycerol, .1% NP-40, .2mM PMSF, 1mM DTT) before washing. Proteins were eluted from beads using a 3xFlag peptide (Sigma) for 1hr and precipitated using trichloroacetic acid before submitting for mass spectrometry. LC-MS/MS was performed at the Taplin Mass Spectrometry Facility (Harvard Medical School) using an LTQ Orbitrap Velos Pro ion-trap mass spectrometer (Thermo Fisher) and Sequest software. GO terms were generated using the ClueGO plugin for Cytoscape.

For immunoprecipitation in HEK293 cells, cells were transiently transfected with *TransIT-LT1* (Mirus) and lysates were prepared 24-48hrs after transfection as described above. Cleared lysates were incubated for 2hrs with magnetic beads conjugated to an anti-Flag antibody [M2] (Sigma)

in Tap wash buffer before washing with Tap wash buffer and elution by boiling in sample buffer containing beta-mercaptoethanol.

### Western Blot

For Western analysis, the following antibodies were purchased from Abcam: anti-hsp90 beta (ab32568); from Millipore Sigma: anti-FLAG (M2); from Santa Cruz Biotechnology, Inc: anti- $\beta$ -actin (C4).

Whole-cell extracts or immunoprecipitates were denatured in Laemmli sample buffer at 95°C for 5 min. Samples were run on a 4-20% Mini-Protean TGX precast gels (Bio-Rad) and transferred onto a nitrocellulose membrane (Bio-rad). Immunoblots were blocked in TBS containing 3% BSA or 5% nonfat milk and 0.1% Tween 20 at room temperature for 1 h and then incubated with primary antibody overnight at 4°C. After washing, membranes were incubated with goat anti-rabbit IgG (H + L) or goat anti-mouse IgG (H + L) conjugated to horseradish peroxidase (Jackson ImmunoResearch Laboratories, Inc.) for 1 h at room temperature in 5% nonfat milk and 0.1% Tween 20 TBS. Then, membranes were washed and developed with SuperSignal West Pico Plus Chemiluminescent Substrate (Thermo Fisher Scientific).

### Tumor transplantation

The MCA-induced fibrosarcoma 1969 used in this study was generated in a female C57BL/6 Rag2<sup>-/-</sup> mouse, was tested for mycoplasma, and was banked at low-passage as previously described (15,80). Tumor cells derived from frozen stocks and propagated in vitro in RPMI media supplemented with 10% FCS (Hyclone) were washed three times with PBS, resuspended at a density of  $6.67 \times 10^6$  cells/ml in endotoxin-free PBS and then 150  $\mu$ l was injected

subcutaneously into the flanks of recipient mice. Tumor growth was measured with a caliper and expressed as the area based on two perpendicular diameters.

For FACS of tumor infiltrating cells tumors were harvested either at day 6 or after 20-25 days of growth, chopped using a razor blade, and digested in Collagenase B (Roche), Collagenase D (Roche), and DNaseI (Sigma-Aldrich) for 45min at 37°C with constant agitation.

### Microarrays

Tumors were injected into mice as described above and allowed to grow for 6 days. On day 6 mice were harvested and inguinal lymph nodes from either the flank with the tumor (draining) or the opposite flank (non-draining) were harvested, digested, and sorted for cDC1 (MHCII<sup>+</sup>CD11c<sup>+</sup>XCR1<sup>+</sup>). RNA was extracted and purified using the Nucleospin xs RNA isolation kit (Macherey-Nagel), amplified with the Ovation Pico WTA System (NuGEN), and hybridized to Mouse Gene 1.0 ST arrays (Affymetrix). Expression values were analyzed after robust multiarray average (RMA) and quantile normalization using ArrayStar 4 software (DNASTAR).

### Infection and Immunization

For *Toxoplasma gondii*, 10-14 week old mice were injected with the type II Prugniaud strain of *T. gondii* expressing a firefly luciferase and GFP transgene (provided by J. Boothroyd, Stanford University, Palo Alto, CA) at a dose of 200 tachyzoites intraperitoneally per mouse as described previously (25). Mice were monitored over 30 days for survival and weight loss.

For cowpox, age- and sex- matched mice were used at 8-10 weeks of age. Mice were anesthetized with ketamine/xylazine and were inoculated intranasally (i.n.) with 5000 pfu of

BAC-derived cowpox Brighton Red (81) in 30  $\mu$ L of minimum essential medium (MEM) (Mediatech). At 7 days post-infection, lungs were harvested, minced, and digested with 22.4  $\mu$ g/mL DNase I (type II; Sigma) and 0.7 mg/mL collagenase (Sigma) at 37°C for 30 minutes. Digested lungs were then passed through 70- $\mu$ m cell strainers and red blood cells were lysed (0.15 M  $\text{NH}_4\text{Cl}$ , 10 mM  $\text{KHCO}_3$ , and 0.1 mM EDTA). Spleens were passed through 70- $\mu$ m strainers without digestion and red blood cells were lysed. Cells were stained with Fixable Viability Dye eFlour 506 (eBioscience) prior to cell surface staining.

For SRBC immunization  $2 \times 10^8$  sheep red blood cells (Colorado Serum Company) were injected i.p. into 8-10 week old mice. Spleens were harvested seven days later and analyzed for germinal center B cell and  $T_{\text{fh}}$  development.

For West Nile Virus, age- and sex-matched mice were used at 10-12 weeks of age. Mice were infected with  $10^2$  PFU of West Nile Virus via foot pad injection. After eight days spleens were harvested and analyzed for CD8 and CD4 T cell responses. Cells were stained with Fixable Viability Dye eFluor 506 (eBioscience) prior to cell surface staining.

### Confocal microscopy

JAWSII cells or DCs from day 10 Flt3L cultures were allowed to adhere to Alcian blue (Electron Microscopy Sciences) coated coverslips at 500K cells/ coverslip. Cells were fixed with 4% paraformaldehyde, quenched with .4M glycine, and blocked using BlockAid (Invitrogen) with .2% saponin. Cells were stained overnight in PBS + .2% saponin + 2% FBS at 4°C, washed with PBS + .2% saponin three times and stained with secondary antibodies for at least 2hrs at 4°C in PBS + .2% saponin + 2% FBS. Coverslips were mounted in ProLong Gold Antifade with DAPI (Invitrogen). Labeled HKLM-OVA was prepared as described (32).

Images were acquired on a Nikon A1Rsi confocal microscope using a 60x oil immersion objective and analyzed using ImageJ.

### Statistics

Statistical analysis was performed using GraphPad Prism (GraphPad Software). Two-way ANOVA with Tukey's multiple comparison test or Mann-Whitney U test was performed to determine statistical significance.

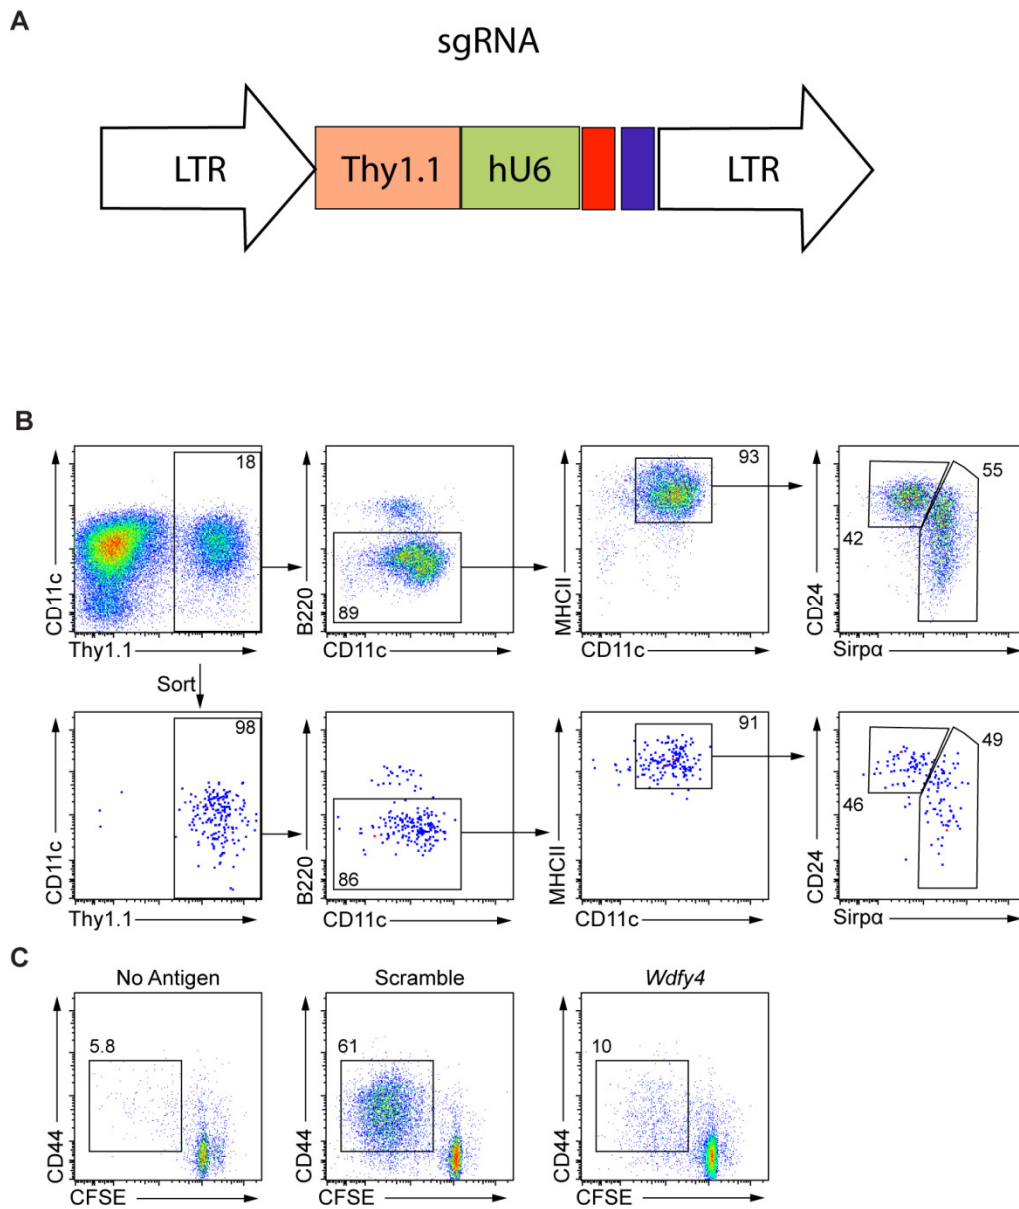

**Figure S1. Functional cross-presentation screen using CRISPR/Cas9.**

(A) A vector was constructed to express a single sgRNA (red/blue) under control of an internal human U6 promoter (green). This cassette is encoded on the sense strand downstream of the Thy1.1 marker (75). (B) Sorting strategy and gating of infected cDCs after Flt3L culture. DCs were sorted as Thy1.1<sup>+</sup> and analyzed by flow cytometry for expression of B220, CD11c, MHC-II, CD24, and Sirpα to verify normal development after target knockout. Sorted Thy1.1<sup>+</sup> cells

were then tested for cross-presentation of cell-associated antigen. (C) Example flow cytometry of OT-I T cells 3 days after co-culture with sgRNA infected DCs and HKLM-OVA. OT-I cells were pre-gated as CD45.1<sup>+</sup>CD8<sup>+</sup>Vα2<sup>+</sup> and then analyzed by CD44 and CFSE.

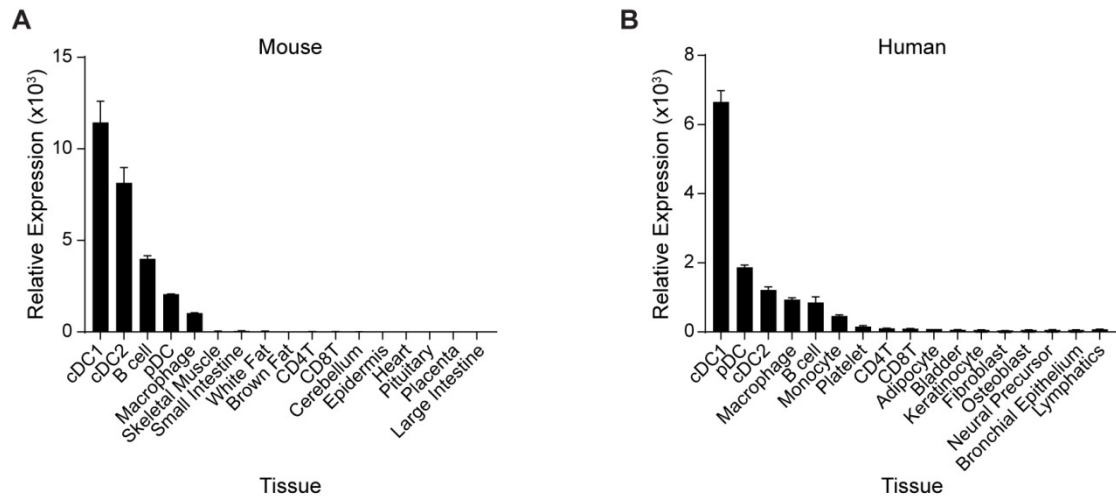

**Figure S2. Expression profile of *Wdfy4*.** (A) Mouse gene expression profile of *Wdfy4* in various tissues. (B) Human gene expression profile of *Wdfy4* in various tissues.



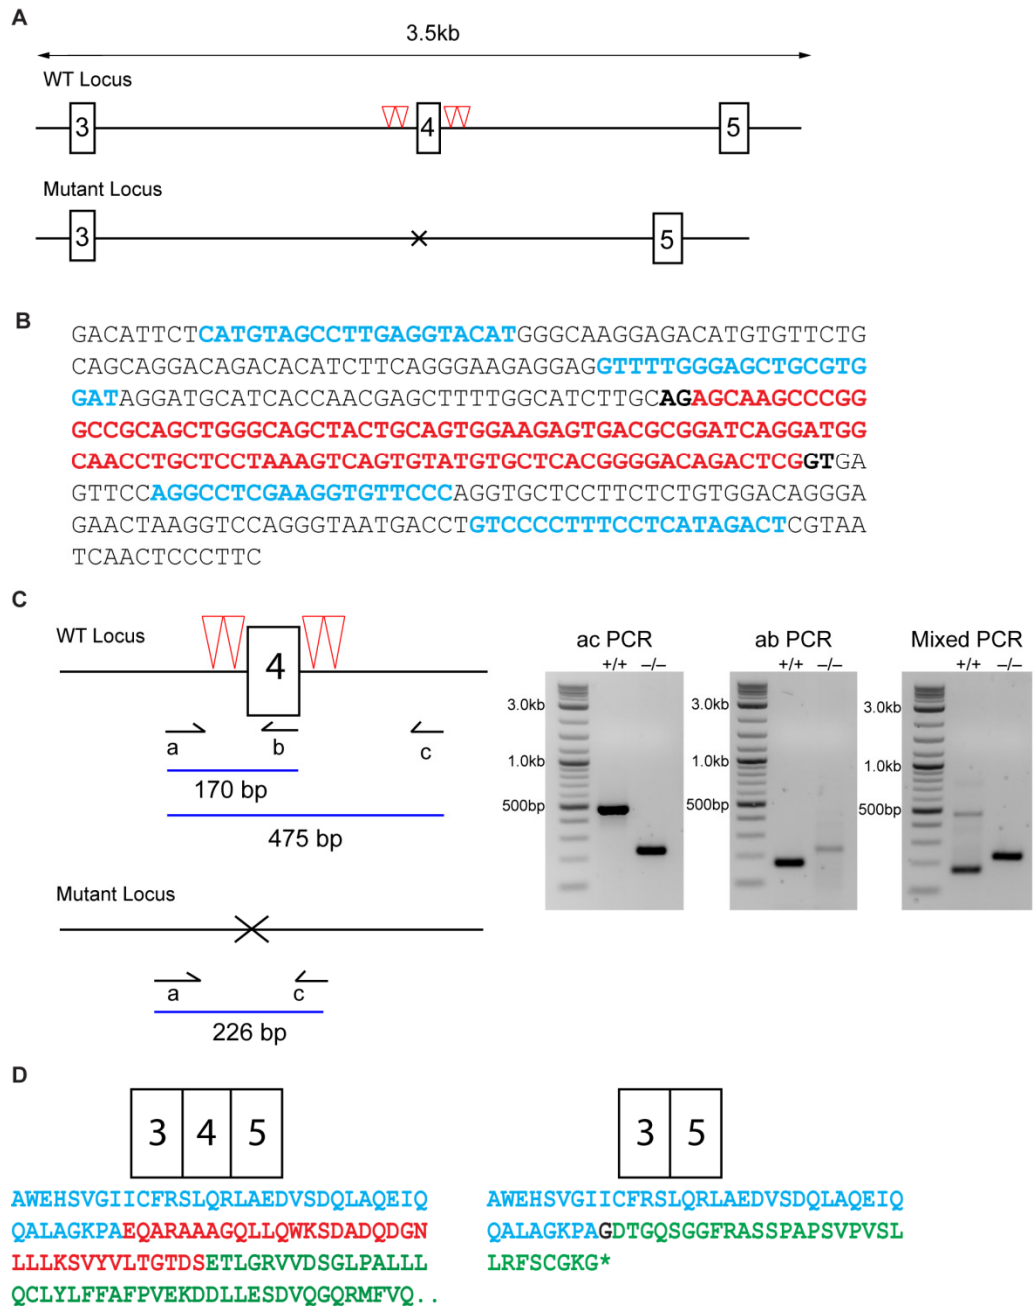

**Figure S3. Characterization of *Wdfy4*<sup>-/-</sup> mice.** (A) *Wdfy4*<sup>-/-</sup> mice were generated by the Knockout Mouse Phenotyping Program (KOMP) at The Jackson Laboratory. The schematic shows the WT and targeted *Wdfy4* locus for exons 3 to 5, showing the locations of the four sgRNAs (red triangles) used for CRISPR/Cas9 to delete exon 4. (B) Shown is the genomic

sequence surrounding exon 4 (black), exon 4 coding region (red), the flanking splice AG acceptor and GT splice donor nucleotides (bold), and the sequences of the four sgRNAs used for CRISPR/Cas9 targeting (blue). (C) Genotyping strategy for identifying *Wdfy4*<sup>+</sup> and *Wdfy4*<sup>-</sup> alleles uses the oligonucleotide primers (a-c), whose locations relative to exon 4 are indicated. The WT allele is identified as a 170 bp PCR product generated with primers a and b. The targeted allele is identified from the 226 bp PCR product with a and c. (D) Shown are the protein sequence of Wdfy4 encoded by exons 3 through 5 of the WT locus (left) and the mutant Wdfy4 protein resulting from the splicing of exon 3 to exon 5 (right) in the targeted locus. Because the coding region of exon 4 contain 107 nucleotides, splicing from exon 3 to 5 results in a shift in the reading from in exon 5 leading to the early translational terminal in exon 5 (\*).

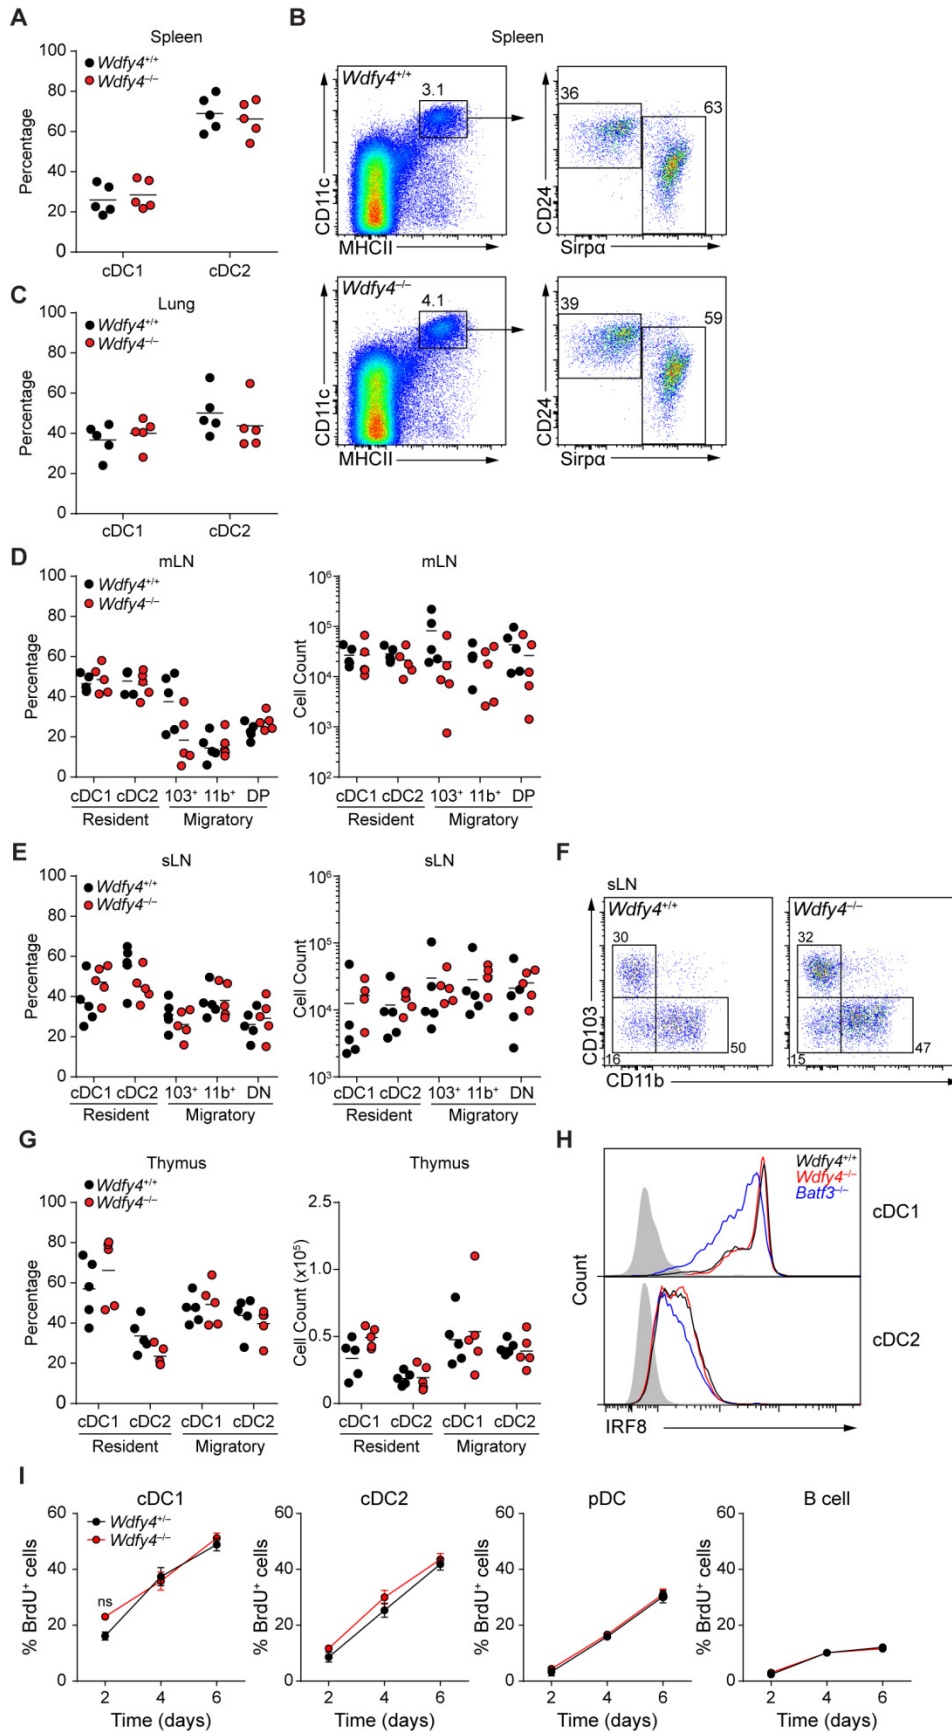

**Figure S4: Normal DC development in *Wdfy4*<sup>-/-</sup> mice.** (A) Percentages of cDC1 (B220<sup>-</sup>CD11c<sup>+</sup>MHCII<sup>+</sup>CD24<sup>+</sup> Sirpα<sup>-</sup>) and cDC2 (B220<sup>-</sup>CD11c<sup>+</sup>MHCII<sup>+</sup>CD24<sup>lo</sup> Sirpα<sup>+</sup>) from spleen of *Wdfy4*<sup>+/+</sup> and *Wdfy4*<sup>-/-</sup> mice. Dot indicates one mouse, bar indicates mean. (B) Representative flow cytometry plots from spleen of *Wdfy4*<sup>+/+</sup> and *Wdfy4*<sup>-/-</sup> mice. Pregated as B220<sup>-</sup>. (C) Percentages of cDC1 (CD45<sup>+</sup>CD64<sup>-</sup>B220<sup>-</sup>CD11c<sup>+</sup>MHCII<sup>+</sup>CD24<sup>+</sup> Sirpα<sup>-</sup>) and cDC2 (CD45<sup>+</sup>CD64<sup>-</sup>B220<sup>-</sup>CD11c<sup>+</sup>MHCII<sup>+</sup>CD24<sup>lo</sup> Sirpα<sup>+</sup>) from lung of *Wdfy4*<sup>+/+</sup> and *Wdfy4*<sup>-/-</sup> mice. Dot indicates one mouse, bar indicates mean. (D-E) Migratory (CD11c<sup>lo</sup> MHC-II<sup>hi</sup>) and resident (CD11c<sup>hi</sup> MHC-II<sup>lo</sup>) cDC1 (resident: CD24<sup>+</sup>Sirpα<sup>-</sup>, migratory: CD103<sup>+</sup>CD11b<sup>-</sup>) and cDC2 (resident: CD24<sup>-</sup>Sirpα<sup>+</sup>, migratory: CD11b<sup>+</sup>CD103<sup>-</sup>) from mLN (D) or sLN (E) were distinguished and shown as a percentage of total cDCs (left) or total cell numbers (right). Dot indicates one mouse, bar indicates mean (F) Representative flow cytometry plots of migratory sLN DCs from *Wdfy4*<sup>+/+</sup> and *Wdfy4*<sup>-/-</sup> mice. Pregated B220<sup>-</sup>CD11c<sup>lo</sup>MHCII<sup>hi</sup>. (G) Thymic migratory (CD11c<sup>lo</sup> MHC-II<sup>hi</sup>) and resident (CD11c<sup>hi</sup> MHC-II<sup>lo</sup>) cDCs were distinguished within cDC1 (resident: CD24<sup>+</sup>Sirpα<sup>-</sup>, migratory: CD103<sup>+</sup>Sirpα<sup>-</sup>) and cDC2 (resident: CD24<sup>-</sup>Sirpα<sup>+</sup>, migratory: CD103<sup>-</sup>Sirpα<sup>+</sup>) and shown as a percentage of total cDCs (left) or total cell numbers (right). Dot indicates one mouse, bar indicates mean. No statistically significant differences in cDC subsets were identified between WT and *Wdfy4*<sup>-/-</sup> mice for any tissues tested. (H) Intracellular staining for IRF8 in splenic cDCs from *Wdfy4*<sup>+/+</sup>, *Wdfy4*<sup>-/-</sup>, and *Batf3*<sup>-/-</sup> mice compared to *Irf8*<sup>-/-</sup> control (gray histogram). (I) BrdU incorporation in indicated cell types over time after daily injections of *Wdfy4*<sup>+/+</sup> and *Wdfy4*<sup>-/-</sup> mice. Data shown as mean ± SEM of three independent experiments. ns. Not significant by 2-way ANOVA.

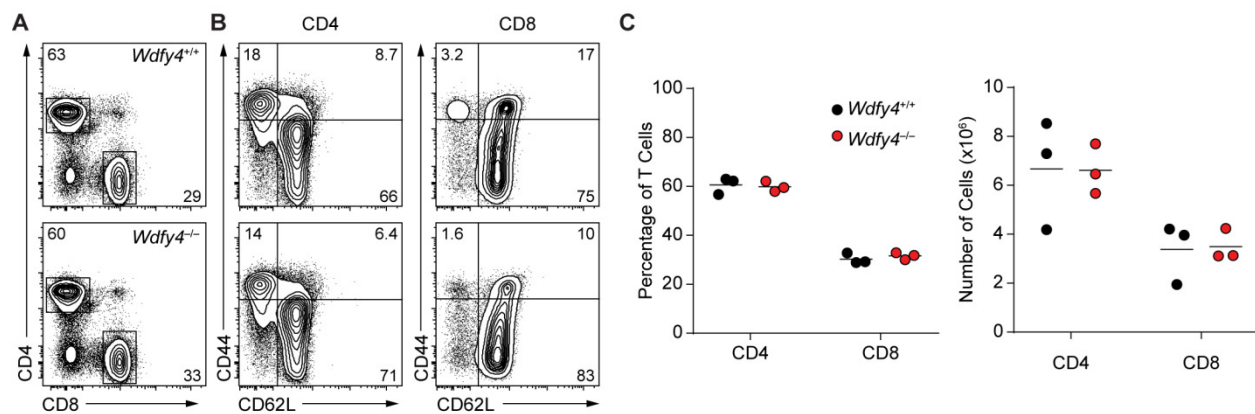

**Figure S5: Normal T cell development in *Wdfy4*<sup>-/-</sup> mice.** (A-C) TCRβ<sup>+</sup> T cells from spleens of *Wdfy4*<sup>+/+</sup> and *Wdfy4*<sup>-/-</sup> mice are shown for CD4 and CD8 expression (A), and for activation markers CD44 and CD62L (B) for CD4 (left) and CD8 (right) T cells respectively. No significant differences in percentages or total numbers of CD4 or CD8 T cells were found between *Wdfy4*<sup>+/+</sup> and *Wdfy4*<sup>-/-</sup> mice (C). Each dot indicates one mouse, horizontal bars indicate mean.

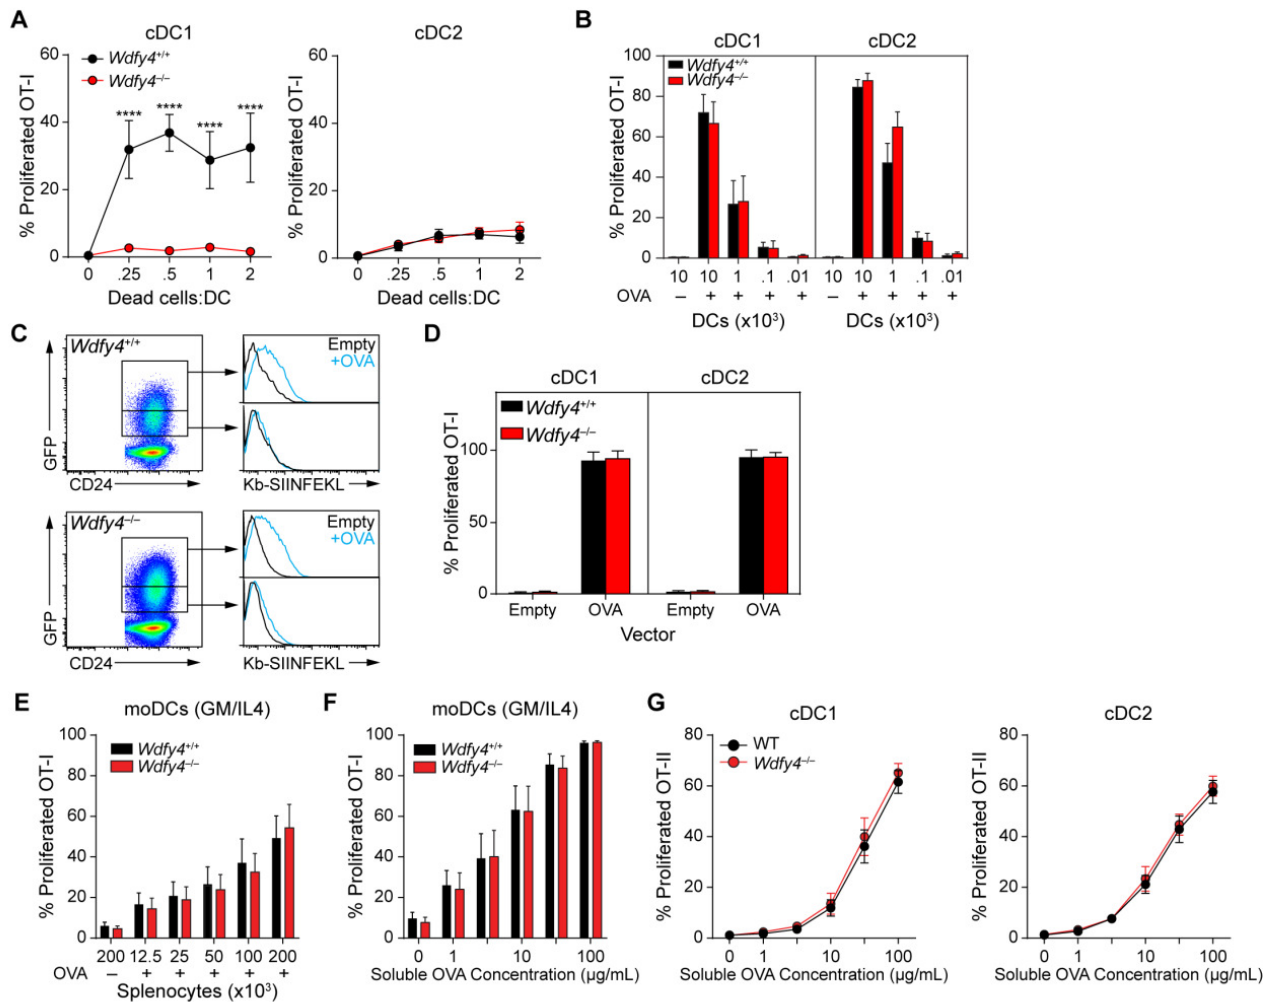

**Figure S6: WDFY4 acts specifically in cDC1-mediated cross-presentation.**

(A) Sort-purified cDC1 and cDC2 from spleens of WT and *Wdfy4*<sup>-/-</sup> mice were assayed for presentation of UVC-irradiated OVA-expressing cells (bm1) to OT-1 T cells. Activated T cells gated as CFSE<sup>-</sup>CD44<sup>+</sup>. (B) Sorted cDC1 and cDC2 from WT or *Wdfy4*<sup>-/-</sup> Flt3L cultures were osmotically loaded with 10mg/ml soluble OVA and then diluted to indicated cell concentrations and cultured with 25K CFSE-labeled OT-I T cells for three days and analyzed for CFSE dilution (CFSE<sup>-</sup>CD44<sup>+</sup>). Control DCs were osmotically shocked but given no OVA (C) Representative flow cytometry plots showing infection of OVA-GFP virus (left) and expression of K<sup>b</sup>-SIINFEKL complexes (right) in WT or *Wdfy4*<sup>-/-</sup> cDC1 (B220<sup>-</sup>CD11c<sup>+</sup>MHCII<sup>+</sup>CD24<sup>+</sup>Sirpα<sup>-</sup>)

compared to empty vector control. **(D)** OT-I proliferation (CFSE<sup>-</sup>CD44<sup>+</sup>) of WT or *Wdfy4*<sup>-/-</sup> cDCs after infection with empty vector or OVA-GFP vector. **(E-F)** MoDCs generated from sorted BM monocytes from WT or *Wdfy4*<sup>-/-</sup> mice were put in culture for four days with 20ng/ml GM-CSF and IL-4. 25K moDCs were cultured for three days with 25K CFSE-labeled OT-I cells and the indicated concentrations of OVA- or PBS- loaded splenocytes (E) or soluble OVA (F). OT-I activation measured as CFSE<sup>-</sup>CD44<sup>+</sup>. **(G)** Sort purified cDC1 and cDC2 from spleens of WT or *Wdfy4*<sup>-/-</sup> mice were cultured for three days with CFSE-labeled OT-II T cells and the indicated concentrations of soluble OVA. Data is shown as percentage of CFSE<sup>-</sup>CD44<sup>+</sup> OT-II cells. For all figures data shown as mean ±SEM from three independent experiments, \*\*\*\**P*<0.0001 using 2-way ANOVA with Tukey's multiple comparisons test.

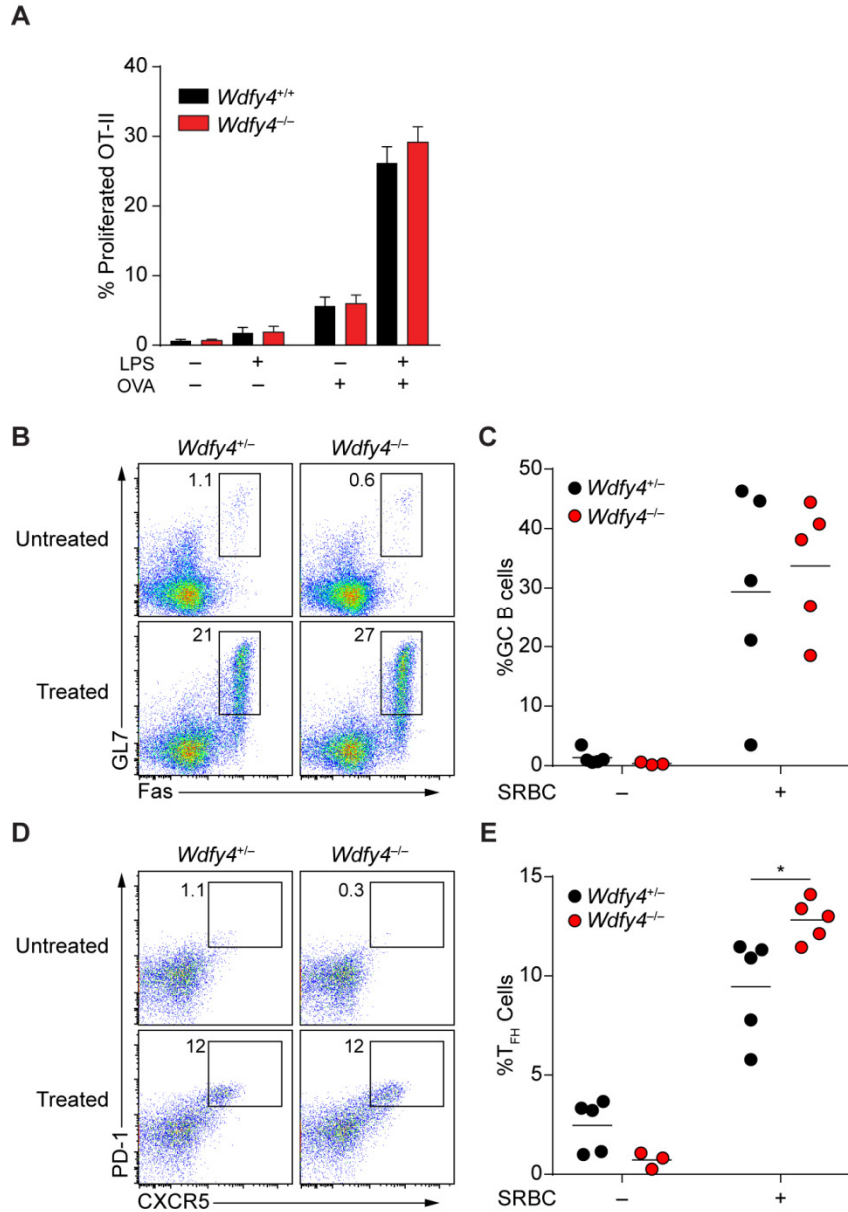

**Figure S7: *Wdfy4*<sup>-/-</sup> mice are capable of inducing normal B cell responses.**

(A) 50K sorted B220<sup>+</sup> B cells were co-cultured for three days with 25K CFSE-labeled OT-II T cells and 100µg/ml soluble OVA with or without 1µg/ml LPS and assayed for CFSE dilution (CFSE<sup>-</sup>CD44<sup>+</sup>). Data shown as mean ± SEM of three independent experiments. (B-C) *Wdfy4*<sup>+/-</sup> and *Wdfy4*<sup>-/-</sup> mice were injected i.p. with sheep red blood cells and spleens were analyzed seven days later for induction of germinal center B cells, summarized in (C). Cells were pre-gated on



B220<sup>+</sup>IgD<sup>-</sup>CD19<sup>+</sup>. Each dot indicates one mouse, bar indicates mean. **(D-E)** *Wdfy4*<sup>+/-</sup> and *Wdfy4*<sup>-/-</sup> mice were injected i.p. with sheep red blood cells and spleens were analyzed seven days later for induction of T<sub>FH</sub> cells, summarized in (E). Cells were pre-gated on B220<sup>-</sup>TCRβ<sup>+</sup>CD4<sup>+</sup>CD62L<sup>-</sup>CD44<sup>+</sup>. Each dot indicates one mouse, bar indicates mean. \* *P*<.05 by 2-way ANOVA.

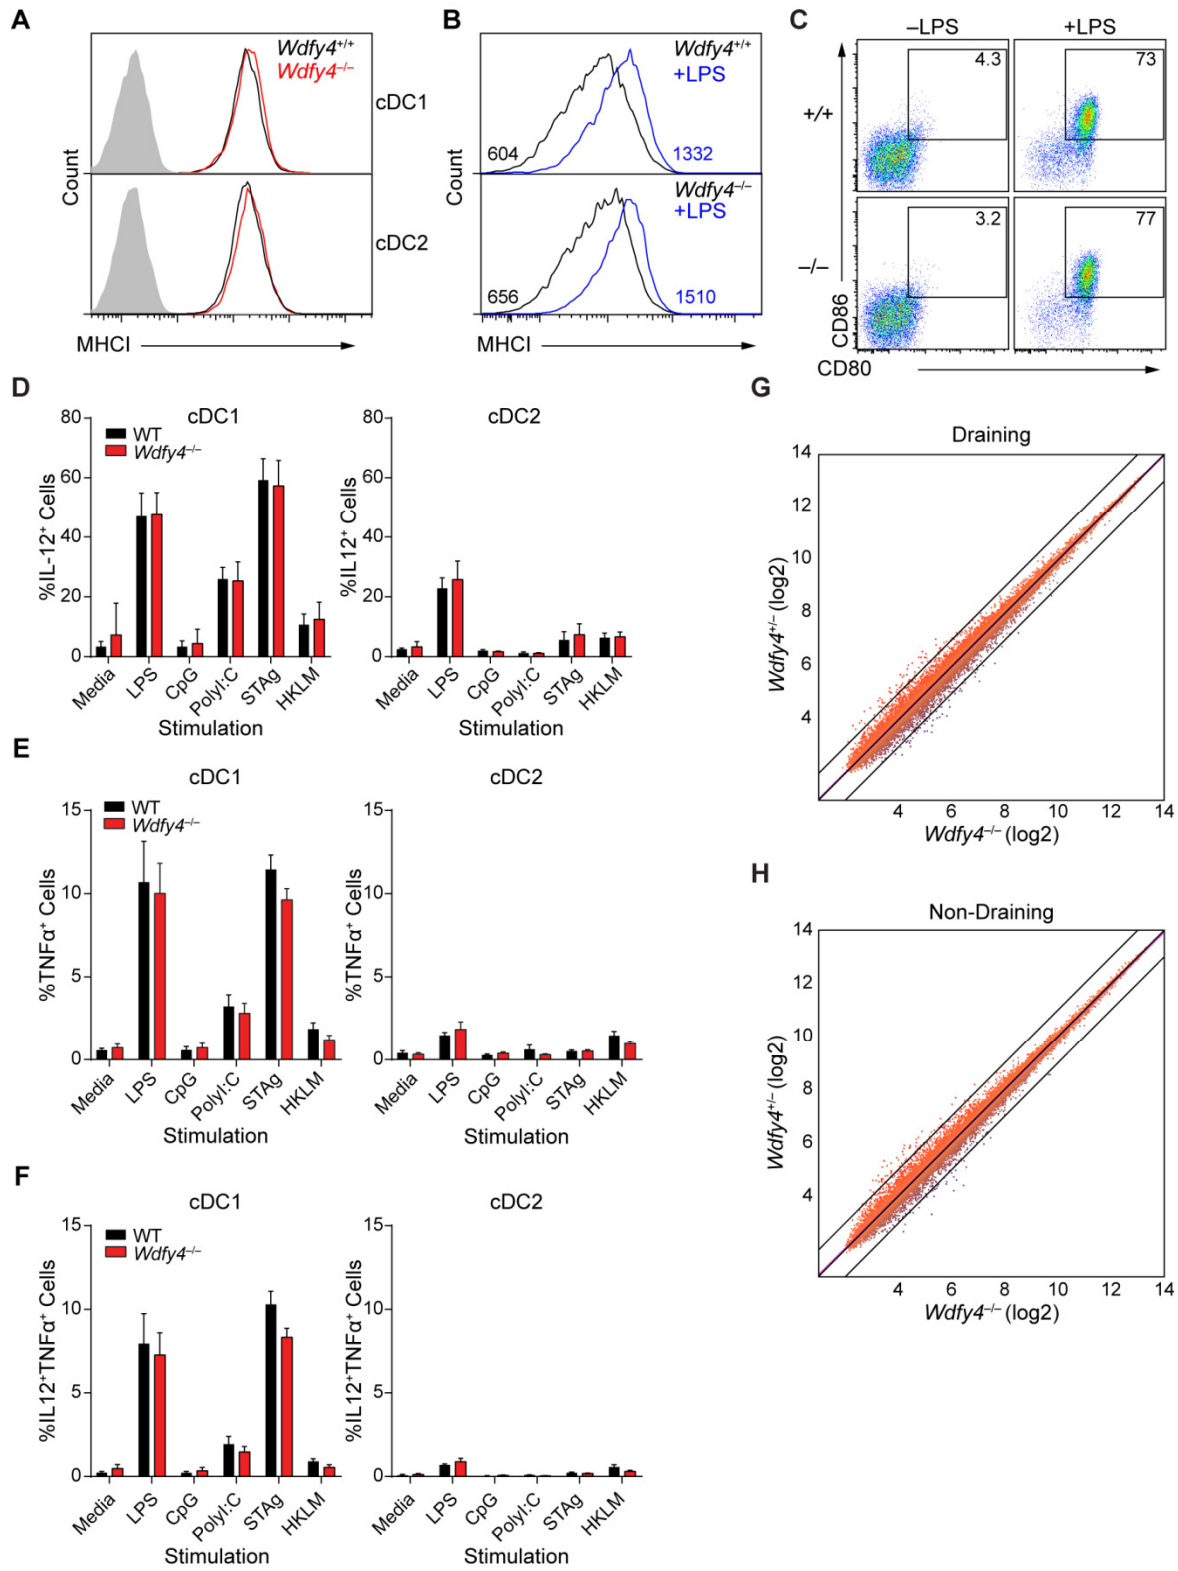

**Figure S8: *Wdfy4*-deficient cDCs are capable of producing signals for T cell priming**

(A) Flow cytometry of splenic cDC1 and cDC2 from WT or *Wdfy4*<sup>-/-</sup> mice for MHC-I compared to MHC-I TKO control mice (gray histogram). Pre-gated on cDC1 (B220<sup>-</sup>CD11c<sup>+</sup>MHCII<sup>+</sup>CD24<sup>+</sup>Sirpα<sup>-</sup>) or cDC2 (B220<sup>-</sup>CD11c<sup>+</sup>MHCII<sup>+</sup>CD24<sup>-</sup>Sirpα<sup>+</sup>) (B) Flow cytometry of day eight Flt3L cultured cDC1 from WT or *Wdfy4*<sup>-/-</sup> mice for MHC-I with either no treatment (black line) or four hours of culture with 1μg/ml LPS (blue bar). Numbers indicate MFI. Pre-gated on cDC1 (B220<sup>-</sup>CD11c<sup>+</sup>MHCII<sup>+</sup>CD24<sup>+</sup>Sirpα<sup>-</sup>). (C) Representative flow cytometry of expression of CD80 and CD86 in cDC1 cells generated from Flt3L cultured bone marrow of indicated genotypes after eight days. Cells were stimulated for four hours with 1μg/mL LPS to induce activation. Pre-gated on cDC1 (B220<sup>-</sup>CD11c<sup>+</sup>MHCII<sup>+</sup>CD24<sup>+</sup>Sirpα<sup>-</sup>). (D-F) Production of IL-12p40 (D), TNFα(E), or IL-12p40 and TNFα (F) by cDC1 (left, B220<sup>-</sup>CD11c<sup>+</sup>MHCII<sup>+</sup>CD24<sup>+</sup>Sirpα<sup>-</sup>) or cDC2 (right, B220<sup>-</sup>CD11c<sup>+</sup>MHCII<sup>+</sup>CD24<sup>-</sup>Sirpα<sup>+</sup>) generated in Flt3L cultures for nine days to indicated stimuli. Data shown as mean ± SEM for three independent experiments. (G-H) Gene expression data from *Wdfy4*<sup>+/-</sup> or *Wdfy4*<sup>-/-</sup> cDC1 from the draining (G) or non-draining (H) inguinal sLN from tumor bearing mice 6 days after injection of 1x10<sup>6</sup> regressor fibrosarcoma cells s.c. n=4 mice per condition. Lines indicate 2-fold changes.

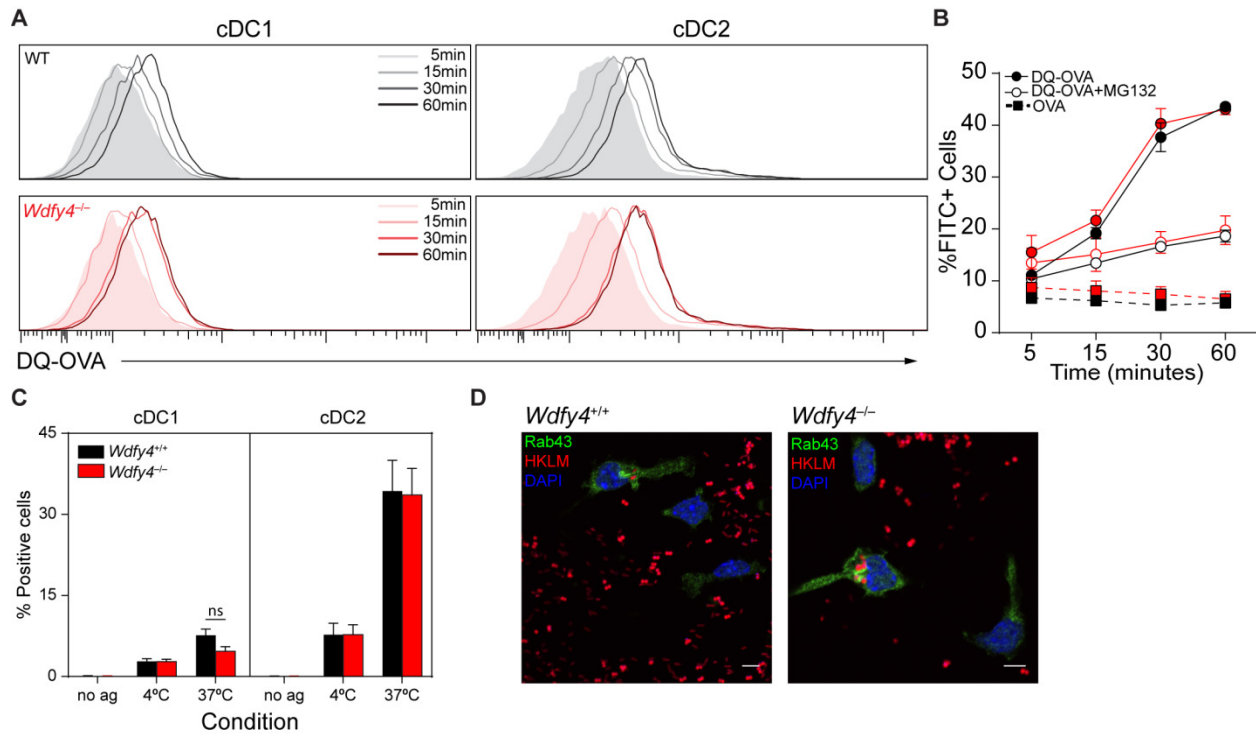

**Figure S9: *Wdfy4*-deficient cDCs can take up and degrade antigen.**

(A) Representative flow cytometry plots of DQ-OVA (10 $\mu$ g/ml) degradation by cDC1 (left, B220<sup>-</sup>CD11c<sup>+</sup>MHCII<sup>+</sup>CD24<sup>+</sup>Sirp $\alpha$ <sup>-</sup>) or cDC2 (right, B220<sup>-</sup>CD11c<sup>+</sup>MHCII<sup>+</sup>CD24<sup>-</sup>Sirp $\alpha$ <sup>+</sup>) generated in Flt3L cultures for nine days, read out by FITC<sup>+</sup> fluorescence. (B) Percentage of *Wdfy4*<sup>+/+</sup> (black) or *Wdfy4*<sup>-/-</sup> (red) FITC<sup>+</sup> cDCs after culture with unlabeled OVA (10 $\mu$ g/ml), DQ-OVA (10 $\mu$ g/ml), or DQ-OVA (10 $\mu$ g/ml) + MG132 (5 $\mu$ g/ml) for indicated times. data shown as mean  $\pm$  SEM from three independent experiments. (C) Representative microscopy images of Flt3L generated DCs from indicated genotypes allowed to uptake HKLM-647 for 4 hours and stained for Rab43 (green) to distinguish cDC1. (D) Quantification of percentage of HKLM-647<sup>+</sup> cDC1 (left, B220<sup>-</sup>CD11c<sup>+</sup>MHCII<sup>+</sup>CD24<sup>+</sup>Sirp $\alpha$ <sup>-</sup>) or cDC2 (right, B220<sup>-</sup>CD11c<sup>+</sup>MHCII<sup>+</sup>CD24<sup>-</sup>Sirp $\alpha$ <sup>+</sup>) after four hours of culture of 1 million Flt3L generated DCs from BM of indicated genotypes with 2 $\times$ 10<sup>8</sup> bacteria at indicated temperatures. Data shown as mean  $\pm$  SEM from three independent experiments.

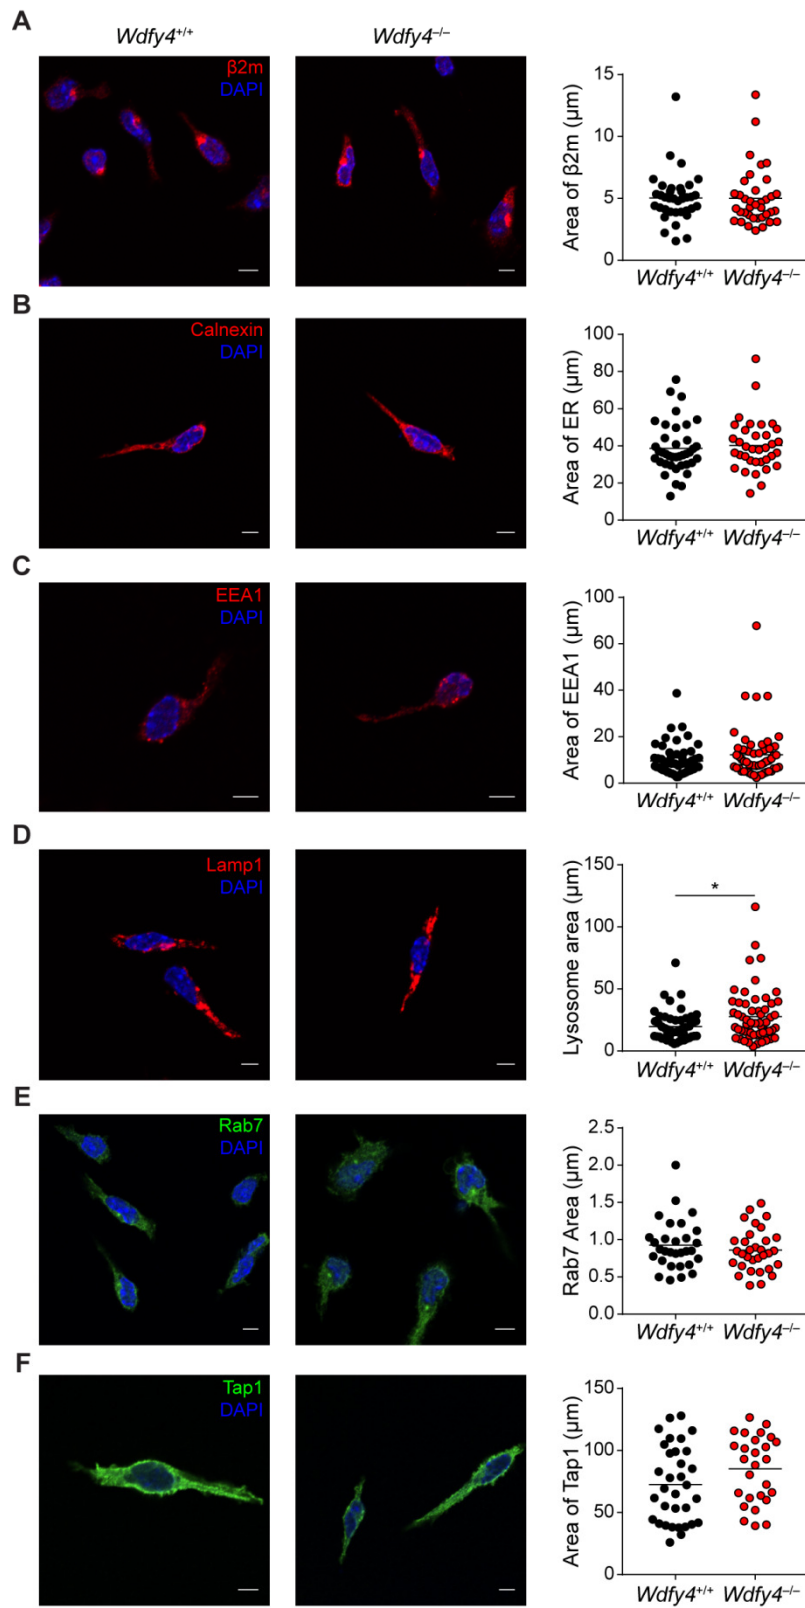

**Figure S10: *Wdfy4*-deficient cDCs have normal cellular structures**

(A-F) Confocal microscopy of day 10 Flt3L-cultured DCs attached to alcian blue coated coverslips for four hours. Cells were fixed, permeabilized, and stained with antibodies against  $\beta$ 2m (A), Calnexin (B), EEA1 (C), Lamp1 (D), Rab7 (E), or Tap1 (F) which were secondary stained with antibodies conjugated to AF488 (green) or AF647 (red) before mounting on slides using Prolong Gold antifade + DAPI (blue). Scale bars indicate 5 $\mu$ m. Staining quantified for each stain on left, each dot indicates one cell, bar indicates mean. n.s. not significant ( $P > .05$ ); \*  $P < .05$  by Mann-Whitney U Test.

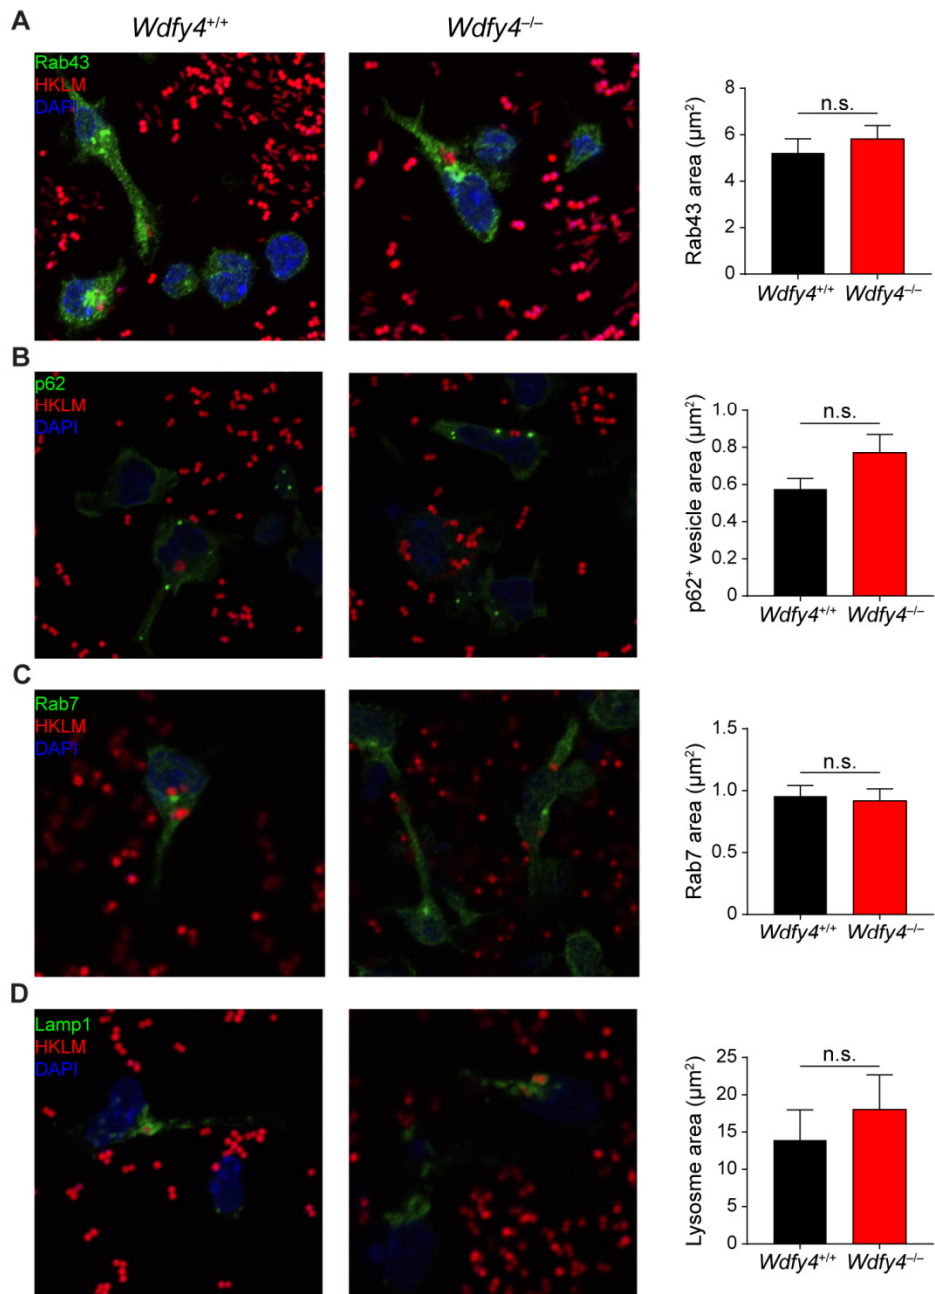

**Figure S11: *Wdfy4*-deficient cDCs have normal cellular structures after antigen uptake.**

**(A-D)** Confocal microscopy of day 10 Flt3L-cultured DCs attached to alcian blue coated coverslips for four hours in the presence of AF647-labeled HKLM-OVA (red). Cells were fixed, permeabilized, and stained with antibodies against RAB43 (A), p62 (B), Rab7 (C), or Lamp1 (D) which were secondary stained with antibodies conjugated to AF488 (green) before mounting on slides using Prolong Gold antifade + DAPI (blue). Area of staining quantified for each stain on left, shown as mean  $\pm$  SEM. n.s. not significant  $P > .05$  by Mann Whitney U Test.



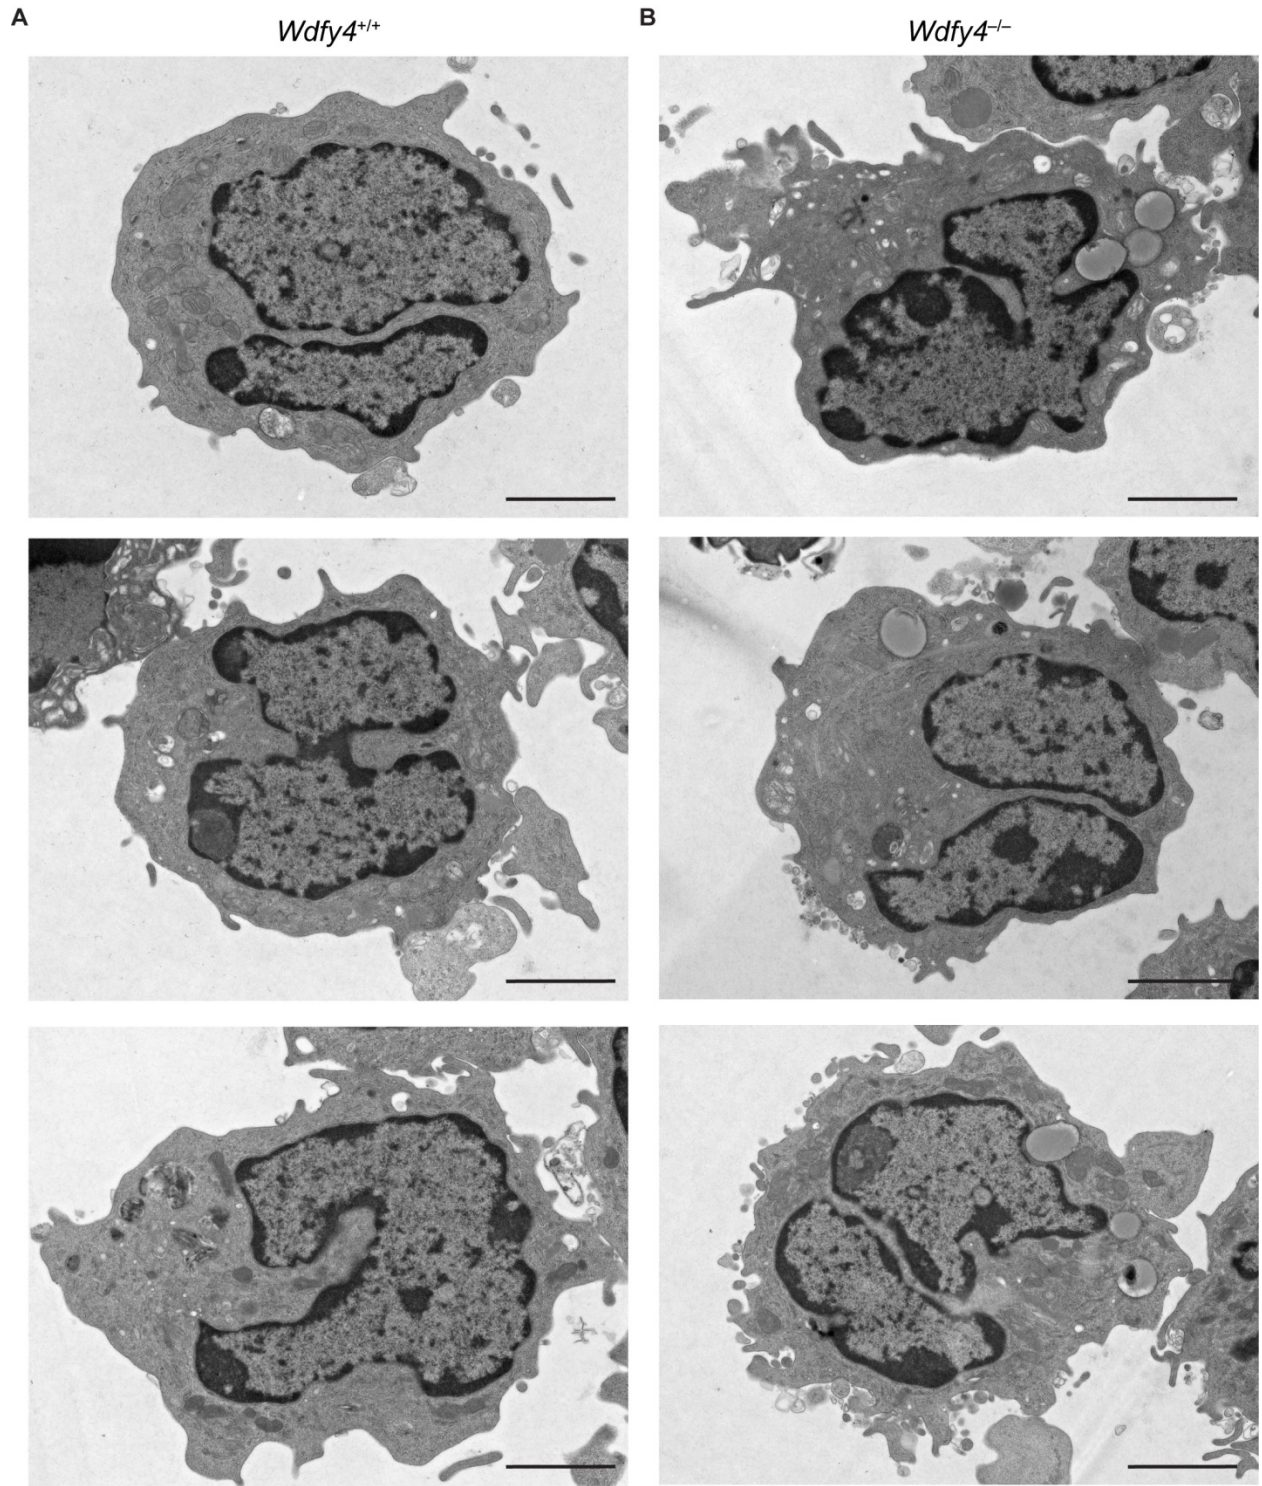

**Figure S12: *Wdfy4*-deficient cDC1 have increased presence of intracellular lipid bodies.**

**(A-B)** Representative EM images of *Wdfy4*<sup>+/+</sup> (A) or *Wdfy4*<sup>-/-</sup> (B) cells analyzed by electron microscopy. Scale bars indicate 2μm.

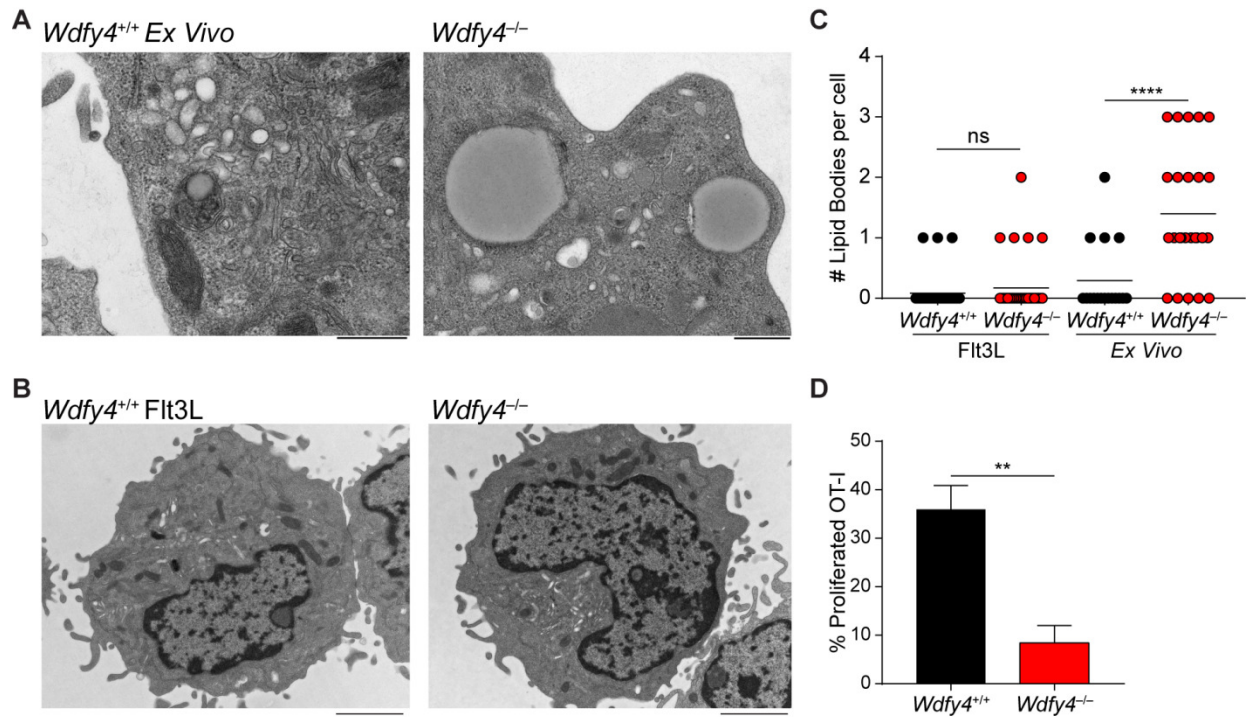

**Figure S13: Presence of lipid bodies in *Wdfy4*-deficient cDC1 does not explain cross-presentation defect**

(A) Representative EM images of *Wdfy4*<sup>+/+</sup> or *Wdfy4*<sup>-/-</sup> cDC1 taken *ex vivo* from spleen, scale bars indicate 500nm (B) Representative EM images of *Wdfy4*<sup>+/+</sup> or *Wdfy4*<sup>-/-</sup> cDC1 from Flt3L cultures, scale bars indicate 2µm (C) Quantification of the number of lipid bodies per cell for indicated samples. Each dot indicates one cell, bar indicates mean. (D) Cross-presentation of 10<sup>7</sup> HLKM-OVA to OT-1 T cells by cDC1 from *Wdfy4*<sup>+/+</sup> or *Wdfy4*<sup>-/-</sup> Flt3L cultures. T cell activation assayed as CFSE<sup>-</sup>CD44<sup>+</sup>. Bars indicate mean ±SEM, ns, not significant ( $P > 0.05$ ); \*\*  $P < .01$ , \*\*\*\*  $P < 0.0001$  using One-way ANOVA (C) or Mann-Whitney U Test (D).

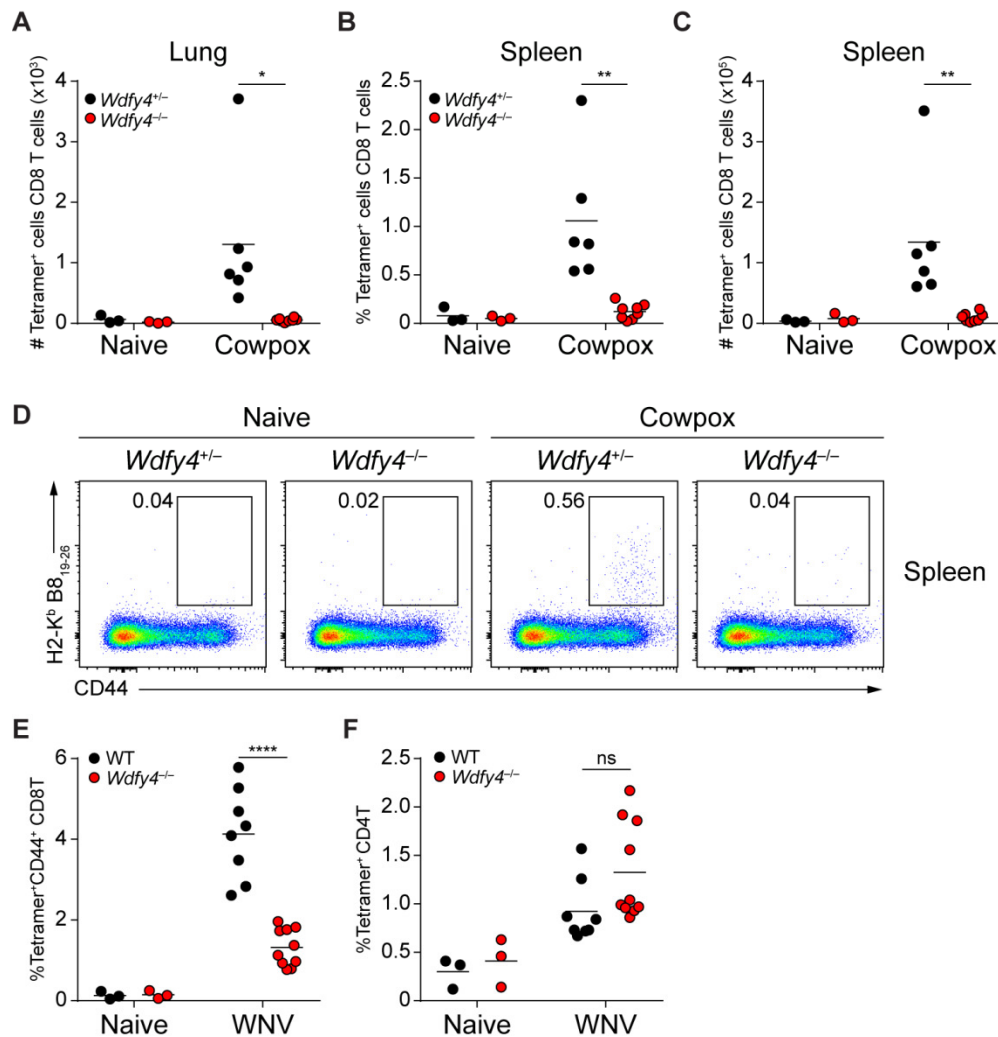

**Figure S14: *Wdfy4*-deficient mice cannot prime CD8 T cells to cowpox virus infection.**

(A-C) Quantification of number (A,C) or percentage (B) of tetramer<sup>+</sup>CD8 T cells from lung (A) or spleen (B,C) of infected or uninfected (naïve) *Wdfy4*<sup>+/-</sup> or *Wdfy4*<sup>-/-</sup> mice. Each dot represents one mouse, bars indicate mean. (D) Representative flow cytometry of CD8 T cells (pregate CD4<sup>-</sup> CD3<sup>+</sup>CD8<sup>+</sup>) from the spleen of naïve or infected *Wdfy4*<sup>+/-</sup> or *Wdfy4*<sup>-/-</sup> mice. (E) Percentage of Tetramer<sup>+</sup>CD44<sup>+</sup> cells within CD8 T cell population in spleen of mice eight days after West Nile Virus infection. (F) Percentage of Tetramer<sup>+</sup> cells within CD4 T cell population in spleen of mice eight days after West Nile Virus infection. Each dot indicates one mouse, bar indicates

mean, ns, not significant, \* $P < 0.05$ ; \*\* $P < 0.01$ , \*\*\*\* $P < .0001$  using 2-way ANOVA with Tukey's multiple comparisons test.

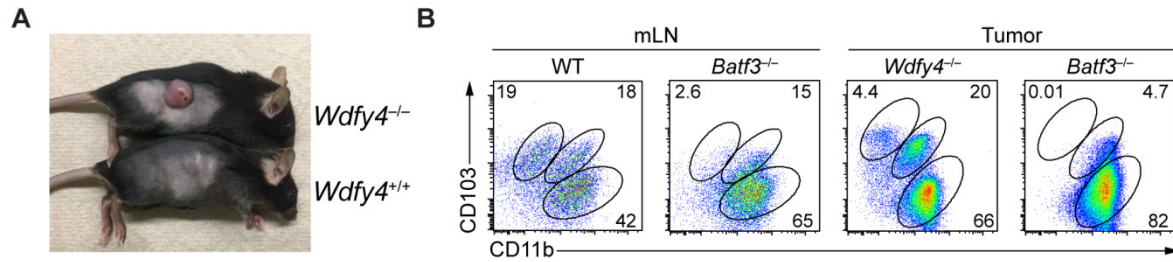

**Figure S15: Analysis of tumors from *WDFY4<sup>-/-</sup>* or *Batf3<sup>-/-</sup>* mice.**

(A) Representative images of tumors from WT and *Wdfy4<sup>-/-</sup>* mice. (B) Representative flow cytometry plots indicating *Batf3*-dependent populations in mLN (pre-gate B220<sup>-</sup> CD11c<sup>+</sup>MHCII<sup>+</sup>) compared to WT (left) and representative flow cytometry plots showing the presence of *Batf3*-dependent DC subsets in tumors (pre-gate B220<sup>-</sup>CD3<sup>-</sup>NK1.1<sup>-</sup>CD11c<sup>+</sup>MHCII<sup>+</sup>) of *Wdfy4<sup>-/-</sup>* mice compared to *Batf3<sup>-/-</sup>* mice after at least 20 days of growth (right).

| Gene     | Name                                                              | cDC1 Expression | cDC2 Expression | Steady State cDC1 | Activated cDC1 | DC Specificity | Other immune cells           | cDC1/cDC 2  | Steady State/Activated |
|----------|-------------------------------------------------------------------|-----------------|-----------------|-------------------|----------------|----------------|------------------------------|-------------|------------------------|
| Leprel1  | leprecan-like1 (prolyl 3-hydroxylase 2)                           | 644.254         | 35.759          |                   |                | cDC1           | none                         | 18.01655527 |                        |
| Ifi205   | interferon induced gene 205                                       | 2242.841        | 131.696         | 8456.33           | 3061.67        | cDC1           | none                         | 17.03044132 | 2.76199917             |
| Hepacam2 | HEPACAM family member 2                                           | 621.812         | 47.902          | 1672              | 85.33          | cDC1           | peritoneal B1                | 12.98091938 | 19.59451541            |
| P2ry14   | Purinergic receptor P2Y, G-protein coupled                        | 831.49          | 69.269          | 658.67            | 18.33          | cDC1, pDC      | Mast cells, lung populations | 12.00378236 | 35.933988              |
| Pdia5    | protein disulfide isomerase associated 5                          | 468.177         | 39.275          | 486.67            | 106.33         | cDC1           | none                         | 11.92048377 | 4.576977335            |
| Naaa     | N-acyl ethanolamine acid amidase                                  | 2377.942        | 217.601         | 9833              | 238.33         | cDC1           | monocytes                    | 10.92799206 | 41.25791969            |
| Cadm1    | cell adhesion molecule 1                                          | 870.215         | 84.588          | 1114.33           | 133.67         | cDC1           | red pulp, liver macrophages  | 10.28768856 | 8.336425526            |
| Mpeg1    | Macrophage expressed gene 1                                       | 1196.745        | 133.271         | 12902.33          | 10090.67       | cDC1, pDC      | monocytes, macrophages       | 8.97978555  | 1.278639575            |
| Fam40b   | family with sequence similarity 40, member B                      | 332.686         | 39.912          | 622.67            | 2346.33        | CD103+ cDC1    | none                         | 8.335488074 | 0.265380403            |
| Ppef2    | Protein phosphatase, EF-hand calcium binding domain 2             | 126.067         | 16.441          | 25                | 12.67          | cDC1           | monocytes                    | 7.667842589 | 1.973164957            |
| Fnip2    | folliculin interacting protein 2                                  | 453.869         | 59.559          | 677               | 246            | cDC1           | Thio-stimulated macrophages  | 7.620493964 | 2.75203252             |
| Naga     | N-acetyl galactosaminidase, alpha                                 | 1068.988        | 142.464         | 2549              | 735            | cDC1           | none                         | 7.503565813 | 3.468027211            |
| Laptm4b  | lysosomal-associated protein transmembrane 4B                     | 540.675         | 73.444          | 907.67            | 4162.33        | Activated cDCs | peritoneal macrophages       | 7.361731387 | 0.218067765            |
| Ppt1     | palmitoyl-protein thioesterase 1                                  | 3361.065        | 531.101         | 10595             | 454.67         | cDC1           | none                         | 6.328485542 | 23.30261508            |
| Unc119b  | unc-119 homolog                                                   | 295.312         | 53.769          | 694               | 43.33          | cDC1           | several                      | 5.492235303 | 16.01661666            |
| Fam149a  | Family with sequence similarity 149, member A                     | 268.271         | 49.625          | 276.67            | 39.67          | cDC1           | none                         | 5.405964736 | 6.974287875            |
| Fmn12    | formin-like 2                                                     | 780.582         | 145.949         |                   |                | All but cDC2   | red pulp MFs, PMNs           | 5.348320304 |                        |
| Ppap2a   | phosphatidic acid phosphatase type 2A                             | 286.48          | 55.916          | 1163              | 172            | cDC1           | red pulp macrophages         | 5.123399385 | 6.761627907            |
| Gclc     | glutamate-cysteine ligase, catalytic subunit                      | 481.738         | 95.955          | 653.33            | 2642.33        | cDC1           | pre-B cells                  | 5.020457506 | 0.247255263            |
| Clec1a   | C-type lectin domain family 1, member a                           | 206.398         | 42.421          |                   |                | cDC1           | none                         | 4.865467575 |                        |
| Gatm     | Glycine Amino-transferase                                         | 195.992         | 42.056          | 3569              | 313            | cDC1           | Some macrophages             | 4.660262507 | 11.40255591            |
| Fndc7    | fibronectin type III domain containing 7                          | 191.991         | 41.929          | 104.67            | 22.33          | cDC1           | none                         | 4.5789549   | 4.687416032            |
| Trpm2    | transient receptor potential cation channel subfamily M, member 2 | 328.227         | 74.946          | 233.67            | 103            | cDC1           | red pulp macrophages, PMNs   | 4.37951325  | 2.268640777            |
| Arhgap42 | Rho GTPase activating protein 42                                  | 184.369         | 43.355          | 22.33             | 22.67          | cDC1           | none                         | 4.252542959 | 0.985002206            |
| Sdad1    | SDA1 domain containing 1                                          | 620.645         | 147.671         | 826.33            | 59.33          | cDC1           | several                      | 4.202890209 | 13.92769257            |
| Aif1     | allograft inflammatory factor 1                                   | 1121.587        | 267.869         |                   |                | cDC1           | monocytes, macrophages       | 4.187072786 |                        |
| ApoL7c   | apolipoprotein L 7C                                               | 2251.617        | 538.871         | 1949              | 6805.33        | cDC1           | none                         | 4.178397056 | 0.286393165            |
| Ece1     | endothelin converting enzyme 1                                    | 865.587         | 212.008         | 907               | 517            | cDC1           | RP MFs, monocytes            | 4.082803479 | 1.754352031            |
| MNDA     | Myloid cell nuclear differentiation antigen                       | 1188.085        | 316.086         |                   |                | cDC1           | macrophages                  | 3.75873971  |                        |

|                 |                                                                 |          |         |         |         |                |                                             |                 |             |
|-----------------|-----------------------------------------------------------------|----------|---------|---------|---------|----------------|---------------------------------------------|-----------------|-------------|
| <b>Plekha5</b>  | pleckstrin homology domain containing, family A member 5        | 251.762  | 69.818  | 319     | 97.67   | cDC1           | NK cells                                    | 3.6059755<br>36 | 3.266100133 |
| <b>Slamf8</b>   | SLAM family member 8                                            | 501.5    | 145.173 | 1646.33 | 42      | cDC1           | monocytes                                   | 3.4544991<br>15 | 39.19833333 |
| <b>Itpril1</b>  | inositol 1,4,5-triphosphate receptor interacting protein-like 1 | 338.432  | 98.738  | 22.67   | 17.67   | cDC1           | none                                        | 3.4275760<br>09 | 1.282965478 |
| <b>Fuca1</b>    | fucosidase, alpha-L- 1, tissue                                  | 1113.487 | 324.88  |         |         | cDC1           | B cells, monocytes                          | 3.4273793<br>4  |             |
| <b>Cxx1c</b>    | CAAX box 1 homolog C                                            | 268.097  | 83.251  | 99      | 36.67   | cDC1           | none                                        | 3.2203457<br>02 | 2.699754568 |
| <b>Zfp367</b>   | zinc finger protein 367                                         | 254.079  | 81.728  |         |         | cDC1           | germinal center B cells, activated NK cells | 3.1088366<br>29 |             |
| <b>Ocstamp</b>  | Osteoclast stimulatory transmembrane protein                    | 274.506  | 88.39   |         |         | cDC1           | Osteoclasts                                 | 3.1056228<br>08 |             |
| <b>Txndc15</b>  | thioredoxin domain containing 15                                | 407.018  | 139.142 |         |         | cDC1           | none                                        | 2.9251987<br>18 |             |
| <b>Tmtc3</b>    | transmembrane and tetratricopeptide repeat                      | 139.514  | 48.782  |         |         | cDC1           | red pulp macrophages, monocytes             | 2.8599483<br>42 |             |
| <b>Zdhhc23</b>  | zinc finger, DHHC domain containing 23                          | 236.277  | 82.976  |         |         | cDC1           | monocytes, red pulp macrophages             | 2.8475342<br>27 |             |
| <b>Rasgrp3</b>  | RAS, guanyl releasing protein 3                                 | 914.018  | 324.428 | 853.33  | 133.33  | cDC1           | B cells                                     | 2.8173215<br>63 | 6.400135003 |
| <b>Dbn1</b>     | drebrin 1                                                       | 204.241  | 74.652  | 78.33   | 30      | cDC1           | none                                        | 2.7359079<br>46 | 2.611       |
| <b>Tmem39a</b>  | transmembrane protein 39a                                       | 543.552  | 200.512 | 636.33  | 2751.67 | cDC1           | none                                        | 2.7108203       | 0.231252294 |
| <b>Mctp1</b>    | multiple C2 domains, transmembrane 1                            | 779.042  | 303.359 | 484.67  | 36      | cDC1           | B cells, monocytes, PMNs                    | 2.5680530<br>33 | 13.46305556 |
| <b>Ttc39a</b>   | tetratricopeptide repeat domain 39A                             | 131.534  | 51.643  |         |         | cDC1           | none                                        | 2.5469860<br>39 |             |
| <b>Tifab</b>    | TRAF-interacting protein with forkhead box                      | 551.118  | 230.354 | 213.67  | 18.67   | All            | Monocytes                                   | 2.3924828<br>74 | 11.44456347 |
| <b>Tspan33</b>  | tetraspanin 33                                                  | 196.332  | 84.5    |         |         | cDC1           | none                                        | 2.3234556<br>21 |             |
| <b>Fzd1</b>     | frizzled homolog 1                                              | 147.277  | 64.989  | 635     | 73      | cDC1           | peritoneal macrophages                      | 2.2661835<br>08 | 8.698630137 |
| <b>Wdfy4</b>    | WD repeat and FYVE domain containing 4                          | 1829.575 | 826.605 | 4710    | 598     | cDC1           | B cells                                     | 2.2133606<br>74 | 7.876254181 |
| <b>Arhgap18</b> | Rho GTPase activating protein 18                                | 459.167  | 209.475 | 434.33  | 36      | cDC1           | B cells, NK cells, macrophages              | 2.1919894<br>98 | 12.06472222 |
| <b>Map2k6</b>   | mitogen-activated protein kinase kinase 6 (MEK6)                | 255.027  | 120.483 | 121     | 41.33   | cDC1           | none                                        | 2.1167052<br>61 | 2.927655456 |
| <b>Arhgap22</b> | Rho GTPase activating protein 22                                | 170.321  | 82.048  | 138.33  | 599     | cDC1           | none                                        | 2.0758702<br>22 | 0.230934891 |
| <b>Mtmr4</b>    | myotubularin related protein 4                                  | 249.61   | 122.059 |         |         | cDC1           | none                                        | 2.0449946<br>34 |             |
| <b>Epst11</b>   | Epithelial stromal interaction 1                                | 1082.682 | 532.351 | 22.67   | 531.67  | cDC1           | NK cells, T cells                           | 2.0337747<br>09 | 0.042639231 |
| <b>Hps5</b>     | Hermansky-Pudlak syndrome 5 homolog                             | 233.46   | 115.889 |         |         | cDC1           | monocytes                                   | 2.0145138<br>88 |             |
| <b>Pfkfb3</b>   | 6-phosphofructo-2-kinase/fructose-2,6-biphosphatase 3           | 361.188  | 181.874 | 462.33  | 3914    | CD103+<br>cDC1 | monocytes                                   | 1.9859243<br>21 | 0.118122126 |
| <b>Tbc1d8</b>   | TBC1 domain family, member 8                                    | 1089.281 | 558.685 | 403.67  | 1471.67 | All            | monocytes                                   | 1.9497230<br>1  | 0.274293829 |
| <b>Ap1s3</b>    | adaptor-related protein complex AP-1, sigma 3                   | 586.278  | 311.206 |         |         | cDC1           | B cells                                     | 1.8838904<br>13 |             |
| <b>Alms1</b>    | Alstrom syndrome 1                                              | 131.586  | 70.269  | 44      | 30.33   | cDC1           | B cell progenitors                          | 1.8726038<br>51 | 1.450708869 |
| <b>Fam190a</b>  | family with sequence similarity 190, member A                   | 106.323  | 57.573  |         |         | cDC1           | none                                        | 1.8467510<br>81 |             |



|                 |                                                                |          |          |          |         |                |                                              |                 |             |
|-----------------|----------------------------------------------------------------|----------|----------|----------|---------|----------------|----------------------------------------------|-----------------|-------------|
| <b>Srsf11</b>   | serine/arginine-rich splicing factor 11                        | 669.647  | 365.266  |          |         | cDC1           | several                                      | 1.8333132<br>57 |             |
| <b>Lrrc40</b>   | leucine rich repeat containing 40                              | 207.079  | 114.077  |          |         | cDC1           | B cells                                      | 1.8152563<br>62 |             |
| <b>Pibid1</b>   | phospholipase B domain containing 1                            | 4539.941 | 2563.829 | 10627.33 | 421.67  | cDC1           | monocytes, PMNs                              | 1.7707659<br>13 | 25.20295492 |
| <b>Mpzl2</b>    | myelin protein zero-like 2 (EVA1)                              | 43.303   | 24.835   | 383.33   | 165.33  | cDC1           | none                                         | 1.7436279<br>44 | 2.318574971 |
| <b>Ptcd2</b>    | pentatricopeptide repeat domain 2                              | 430.296  | 254.133  |          |         | cDC1           | none                                         | 1.6931921<br>47 |             |
| <b>Dock5</b>    | dedicator of cytokinesis 5                                     | 817.625  | 492.62   | 321.67   | 82.33   | cDC1           | monocytes, PMNs, NK cells, activated T cells | 1.6597478<br>79 | 3.907081258 |
| <b>PIK3cb</b>   | phosphatidylinositol 3-kinase, catalytic, beta polypeptide     | 891.243  | 565.375  | 671.67   | 319.67  | cDC1           | PMNs, monocytes                              | 1.5763749<br>72 | 2.101135546 |
| <b>Cdk14</b>    | cyclin-dependent kinase 14                                     | 433.634  | 277.568  | 711.33   | 251.33  | cDC1           | none                                         | 1.5622622<br>2  | 2.830263001 |
| <b>Lrrc18</b>   | leucine rich repeat containing 18                              | 624.324  | 411.68   | 27.67    | 27.67   | cDC1           | none                                         | 1.5165274       | 1           |
| <b>Havcr2</b>   | Hepatitis A virus cellular receptor 2                          | 886.503  | 590.72   | 791.33   | 35.67   | cDC1           | Macrophages                                  | 1.5007160<br>75 | 22.18474909 |
| <b>Erlin1</b>   | ER lipid raft associated 1                                     | 461.626  | 313.719  | 2605     | 2147.33 | cDC1           | monocytes                                    | 1.4714633<br>16 | 1.213134451 |
| <b>Rala</b>     | v-ral simian leukemia viral oncogene homolog A (ras related)   | 656.41   | 467.7    | 658      | 274.67  | cDC1           | none                                         | 1.4034851<br>4  | 2.395601995 |
| <b>Sh3bp1</b>   | SH3-domain binding protein 1                                   | 398.673  | 286.586  |          |         | cDC1           | monocytes                                    | 1.3911112<br>2  |             |
| <b>Wdr86</b>    | WD repeat domain 86                                            | 189.862  | 139.383  | 87.33    | 51.67   | cDC1           | none                                         | 1.3621603<br>78 | 1.690149023 |
| <b>Cacnb3</b>   | calcium channel, voltage dependent, beta 3 subunit             | 78.588   | 62.484   | 66.33    | 2514    | cDC1           | none                                         | 1.2577299<br>79 | 0.026384248 |
| <b>Lrrk2</b>    | leucine-rich repeat kinase 2                                   | 644.256  | 545.687  | 578.67   | 146.33  | cDC1           | B cells, PMNs                                | 1.1806328<br>54 | 3.954554773 |
| <b>Insm1</b>    | Insulinoma associated 1                                        | 67.877   | 58.615   | 16       | 1762.33 | Activated DCs  | none                                         | 1.1580141<br>6  | 0.00907889  |
| <b>Dock7</b>    | dedicator of cytokinesis 7                                     | 199.721  | 175.659  |          |         | cDC1           | B cells, macrophages, monocytes              | 1.1369813<br>1  |             |
| <b>Tbc1d9</b>   | TBC1 domain family, member 9                                   | 741.905  | 668.595  |          |         | cDC1           | monocytes                                    | 1.1096478<br>44 |             |
| <b>Slamf7</b>   | SLAM family member 7                                           | 2651.531 | 2419.749 |          |         | cDC1           | B cells, NK cells, activated T cells         | 1.0957876<br>21 |             |
| <b>Fscn1</b>    | fascin homolog 1, actin bundling protein                       | 84.504   | 77.395   | 31       | 567.33  | CD103+ cDC1    | none                                         | 1.0918534<br>79 | 0.054641919 |
| <b>Bloc1s2</b>  | biogenesis of lysosome-related organelles complex-1, subunit 2 | 519.446  | 476.41   |          |         | All            | none                                         | 1.0903339<br>56 |             |
| <b>Cdc14a</b>   | CDC14 cell division cycle 14 homolog A                         | 543.912  | 513.91   | 803.33   | 323     | cDC1           | PMNs, gamma-delta T cells                    | 1.0583798<br>72 | 2.487089783 |
| <b>Clu</b>      | Clusterin                                                      | 38.817   | 37.812   | 18       | 1978.67 | Activated cDC1 | None                                         | 1.0265788<br>64 | 0.00909702  |
| <b>Rogdi</b>    | rogdi homolog                                                  | 718.925  | 735.088  | 537.67   | 1075    | All            | PMNs, monocytes                              | 0.9780121<br>56 | 0.50015814  |
| <b>Gcfc1</b>    | GC-rich sequence DNA binding factor 1                          | 554.587  | 590.824  |          |         | All            | several                                      | 0.9386670<br>14 |             |
| <b>ETV3</b>     | ets variant gene 3                                             | 58.411   | 62.481   | 274.33   | 1571.33 | All cDC        | several                                      | 0.9348601<br>98 | 0.174584588 |
| <b>Serp1b1a</b> | Serine peptidase inhibitor beta 1 subunit a                    | 35.016   | 54.243   | 29       | 835.67  | Activated DCs  | B cells, macrophages, neutrophils            | 0.6455395<br>17 | 0.034702694 |
| <b>FoxP4</b>    | forkhead box P4                                                | 120.622  | 196.225  | 24       | 69.33   | Activated DCs  | none                                         | 0.6147127<br>02 | 0.346170489 |
| <b>Tbc1d4</b>   | TBC1 domain family, member 4                                   | 134.851  | 298.759  | 947      | 1899.33 | All cDCs       | none                                         | 0.4513705<br>03 | 0.498596874 |

|               |                                |        |        |    |      |                   |             |                 |             |
|---------------|--------------------------------|--------|--------|----|------|-------------------|-------------|-----------------|-------------|
| <b>Gpr126</b> | G-protein coupled receptor 126 | 25.589 | 137.69 | 90 | 1165 | Activated<br>cDCs | macrophages | 0.1858450<br>14 | 0.077253219 |
|---------------|--------------------------------|--------|--------|----|------|-------------------|-------------|-----------------|-------------|

**Table S1: Expression profiles of candidate genes for CRISPR screen**

Expression values taken from previously published resources (82-84).

|    | Gene    | Primer 1                   | Primer 2                   |
|----|---------|----------------------------|----------------------------|
| A  | WDFY4   | CACCGATCTGCTTCGCCAACGATGG  | AAACCCATCGTTGGCGAAGCAGATC  |
| B  | WDFY4   | CACCGAAAGACTGAGGACAGACCCG  | AAACCGGGTCTGTCTCAGTCTTTC   |
| C  | Fam149a | CACCGGAAGGTCGCTGTGTTGGACC  | AAACGGTCCAACACAGCGACCTTCC  |
| D  | Lrrk2   | CACCGCATGGCCAGTGGCGCCTGTC  | AAACGACAGGCGCCACTGGCCATGC  |
| E  | Fam190a | CACCGTCTCCCGGTTGCCAATATTC  | AAACGAATATTGGCAACCGGGAGAC  |
| F  | Pdia5   | CACCGTGGGGGCTGCTACTGGCGAT  | AAACATCGCCAGTAGCAGCCCCAC   |
| G  | Txndc15 | CACCGGGGCCTTCGGGCCACGGCC   | AAACGGCCGTGGGCGGAAGGCCCC   |
| H  | Ttc39a  | CACCGGGGCTGTCATGCACTGGTCC  | AAACGGACCAGTGCATGACAGCCCC  |
| I  | Mtmr4   | CACCGGGGCATCGTTGCCCGGCC    | AAACGGGCCGGGCAACCGATGCCCC  |
| J  | Ece1    | CACCGGCGGACCGTGTGGTCGCCGC  | AAACGCGGCGACCACCGGTCCGCC   |
| K  | Ece1    | CACCGGGTGCAGCATGCGGACCGTG  | AAACCACGGTCCGCATGCTGCACCC  |
| L  | Tex2    | CACCGCCGGCAATGACAAGTCTGAA  | AAACTTCAGACTTGTATTGCCGGC   |
| M  | Tex2    | CACCGTGATGGTTTTGGCATGTCAA  | AAACTTGACATGCCAAAACCATCAC  |
| N  | Cacnb3  | CACCGTGTAGGAGTCGGCTGAACCC  | AAACGGGTTTCAGCCGACTCCTACAC |
| O  | Rogdi   | CACCGCGCGGCGCTCGCAGCCATCG  | AAACCGATGGCTGCGAGCGCCGCGC  |
| P  | Srsf11  | CACCGGCAGTGGTCCCAGCGCGCC   | AAACGGCGCGCTGGGGACCACTGCC  |
| Q  | Srsf11  | CACCGAGCTGCTACATGATTCAATC  | AAACGATTGAATCATGTAGCAGCTC  |
| R  | Strip2  | CACCGTGCCGCGGGGTCGTCCATGC  | AAACGCATGGACGACCCCGCGGCAC  |
| S  | Strip2  | CACCGAAACGGCTCTTCATTATGTG  | AAACCACATAATGAAGAGCCGTTTC  |
| T  | Etv3    | CACCGGAAAGCAGGCTGTAGCATCG  | AAACCGATGCTACAGCCTGCTTTC   |
| U  | Etv3    | CACCGCTACAAAGCCGAGTCGTTCGC | AAACGCGACGACTCGGCTTTGTAGC  |
| V  | Foxp4   | CACCGCCGTCTGGTCAGAACGGCGT  | AAACACGCCGTTCTGACCAGACGGC  |
| W  | Foxp4   | CACCGACAATCAGGTCGGCTCCGTC  | AAACGACGGAGCCGACCTGATTGTC  |
| X  | Insm1   | CACCGCCCCTGTCTACCGGGTCCG   | AAACCGGACCCGTTAGGACACGGGC  |
| Y  | Insm1   | CACCGGGTCACTGTCTCGCCGCCG   | AAACCGGCGGCGAGGACAGTGACCC  |
| Z  | Naaa    | CACCGCCACCAGGGCCGCGTGCCAT  | AAACATGGCACGCGGCCCTGGTGGC  |
| AA | Naaa    | CACCGTACTGTGCTGTCCGGTCCC   | AAACGGGACCGGACAGCGACAGTAC  |
| AB | Sdad1   | CACCGGCGGGACCCGCCGCCTACG   | AAACCGTAGGCCGGCGGGTCCC GCC |
| AC | Sdad1   | CACCGCCGGCGGGTCCCCTTGATC   | AAACGATCAAGCGGGACCCGCCGGC  |

|    |          |                                            |                                             |
|----|----------|--------------------------------------------|---------------------------------------------|
| AD | Gpr126   | <a href="#">CACCGTGTGGACTCTCGGGAAG</a>     | <a href="#">AAACCTTCCCGAGAGTGTCAAACAC</a>   |
| AE | Gpr126   | <a href="#">CACCGGGAGACGTAAAGGTACCGGA</a>  | <a href="#">AAACTCCGGTACCTTTACGTCTCCC</a>   |
| AF | Rala     | <a href="#">CACCGTCTGCAGTTCATGTACGACG</a>  | <a href="#">AAACCGTCTGATCATGAACTGCAGAC</a>  |
| AG | Rala     | <a href="#">CACCGTCGCAGCTACCGCGGACTTC</a>  | <a href="#">AAACGAAGTCCGCGGTAGCTGCGAC</a>   |
| AH | Rnf115   | <a href="#">CACCGCGGGGCTCTTACCGGTAGTT</a>  | <a href="#">AAACAACACTACCGGTAAGAGCCCCGC</a> |
| AI | Rnf115   | <a href="#">CACCGCATGGCGGAGGCCTCGGCGG</a>  | <a href="#">AAACCCGCCGAGGCCTCCGCCATGC</a>   |
| AJ | Slamf8   | <a href="#">CACCGCAACGGCCATGTGGTCCCTC</a>  | <a href="#">AAACGAGGGACCACATGGCCGTTGC</a>   |
| AK | Slamf8   | <a href="#">CACCGTCACGCACTTGAAGCCCGG</a>   | <a href="#">AAACCCGGGCTTCCAAGTGCCTGAC</a>   |
| AL | Tmem39a  | <a href="#">CACCGGCCGCCGACCAACGTCTGTA</a>  | <a href="#">AAACTACAGACGTTGGTCGGCGGCC</a>   |
| AM | Tmem39a  | <a href="#">CACCGATACAGACGTTGGTCGGCGG</a>  | <a href="#">AAACCCGCCGACCAACGTCTGTATC</a>   |
| AN | Laptm4b  | <a href="#">CACCGCCGCACCGGCACCATCCTGC</a>  | <a href="#">AAACGCAGGATGGTGCCGGTGCGGC</a>   |
| AO | Laptm4b  | <a href="#">CACCGGGCTACTTACGGTGCATACA</a>  | <a href="#">AAACTGTATGCACCGTAAGTAGCCC</a>   |
| AP | Laptm4b  | <a href="#">CACCGCCAGGTACCAGACGCCAGC</a>   | <a href="#">AAACGCTGGGCGTCTGGTACCTGGC</a>   |
| AQ | Ppt1     | <a href="#">CACCGTGGCGTCGTCCTGTTCCGGG</a>  | <a href="#">AAACCCGCGAACAGGACGACGCCAC</a>   |
| AR | Ppt1     | <a href="#">CACCGAGATGGCGTCGTCCTGTTCCG</a> | <a href="#">AAACCGAACAGGACGACGCCATCTC</a>   |
| AS | Unc119b  | <a href="#">CACCGAGCCGTCGTCGGGCGTGTGT</a>  | <a href="#">AAACACACACGCCCGACGACGGCTC</a>   |
| AT | Unc119b  | <a href="#">CACCGCCGGCTCAAGGCGCGACGCC</a>  | <a href="#">AAACGGCGTCGCGCCTTGAGCCGGC</a>   |
| AU | Fndc7    | <a href="#">CACCGTAGAATGGACTACCGTGCCA</a>  | <a href="#">AAACTGGCACGGTAGTCCATTCTAC</a>   |
| AV | Fndc7    | <a href="#">CACCGGCAATAGTATCACCGTAGAA</a>  | <a href="#">AAACTTCTACGGTGATACTATTGCC</a>   |
| AW | Leprel1  | <a href="#">CACCGGCGACTATGAGCGAGCGGTG</a>  | <a href="#">AAACCACCGCTCGCTCATAGTCGCC</a>   |
| AX | Leprel1  | <a href="#">CACCGGAGCAGTACCGGCGCCTAC</a>   | <a href="#">AAACGTAGGCGCCGGTGACTGCTCC</a>   |
| AY | Ifi205   | <a href="#">CACCGGAAACGTGGTATATTTCTCT</a>  | <a href="#">AAACAGAGAAATATACCACGTTTCC</a>   |
| AZ | Ifi205   | <a href="#">CACCGTGAAGCCGAAGATGAGACCT</a>  | <a href="#">AAACAGGTCTCATCTTCGGCTTAC</a>    |
| BA | Hepacam2 | <a href="#">CACCGCCGCTGCAGTTCACCGATGA</a>  | <a href="#">AAACTCATCGGTGAAGTGCAGCGGC</a>   |
| BB | Hepacam2 | <a href="#">CACCGAACGGAGCCTAGCAAGTATT</a>  | <a href="#">AAACAATACTTGCTAGGCTCCGTTT</a>   |
| BC | Cadm1    | <a href="#">CACCGGGATCAGTGCCGCGGCCGAA</a>  | <a href="#">AAACTTCGGCCGCGGCACTGATCCC</a>   |
| BD | Cadm1    | <a href="#">CACCGGCCGCACACTGGGATCCGCT</a>  | <a href="#">AAACAGCGGATCCCAGTGTGCGGCC</a>   |
| BE | Mpeg1    | <a href="#">CACCGCTTGGAGAAACGGGTACCAC</a>  | <a href="#">AAACGTGGTACCCGTTTCTCCAAGC</a>   |
| BF | Mpeg1    | <a href="#">CACCGGAAGCTGTTTCATGGCGCAGA</a> | <a href="#">AAACTCTGCGCCATGAACAGCTTCC</a>   |
| BG | Naga     | <a href="#">CACCGTTACAGCGGAAGCGTTCCC</a>   | <a href="#">AAACGGGAACGCTTCCGCTGTAACC</a>   |

|    |         |                                            |                                            |
|----|---------|--------------------------------------------|--------------------------------------------|
| BH | Naga    | <a href="#">CACCGCCGCTGTAACATCGACTGTG</a>  | <a href="#">AAACCACAGTCGATGTTACAGCGGC</a>  |
| BI | Gclc    | <a href="#">CACCGCGCTCCATTCAGTAACAAC</a>   | <a href="#">AAACGTTGTTACTGAATGGAGGCGC</a>  |
| BJ | Gclc    | <a href="#">CACCGCGATGTTCTTGAGACTCTGC</a>  | <a href="#">AAACGCAGAGTCTCAAGAACATCGC</a>  |
| BK | Aif1    | <a href="#">CACCGGAGCCAAAGCAGGGATTTGC</a>  | <a href="#">AAACGCAAATCCCTGCTTTGGCTCC</a>  |
| BL | Aif1    | <a href="#">CACCGAAAAGCTTTTGGACTGCTGA</a>  | <a href="#">AAACTCAGCAGTCCAAAAGCTTTTC</a>  |
| BM | Apol7c  | <a href="#">CACCGAGTGGCCCCAGACTTATTTTC</a> | <a href="#">AAACGAAATAAGTCTGGGGCCACTC</a>  |
| BN | Apol7c  | <a href="#">CACCGGTTGGTTGGCACCAGGTTCC</a>  | <a href="#">AAACGGAACCTGGTGCCAACCAACC</a>  |
| BO | Arsb    | <a href="#">CACCGCTTCGTGCTGGCGGACGACC</a>  | <a href="#">AAACGGTCGTCCGCCAGCACGAAGC</a>  |
| BP | Arsb    | <a href="#">CACCGGGTCATCCGCACGCCGACC</a>   | <a href="#">AAACGGTGCGGCGTGCGGATGACCC</a>  |
| BQ | Ocstamp | <a href="#">CACCGTCCTTGCCAGTCTTATCGC</a>   | <a href="#">AAACGCGATAAGACTGGCCAAGGAC</a>  |
| BR | Ocstamp | <a href="#">CACCGGGTCAGTAGTTCTGTACAGC</a>  | <a href="#">AAACGCTGTAACGAACTACTGACCC</a>  |
| BS | Plbd1   | <a href="#">CACCGGCGATGTGCCACCGCAGCCC</a>  | <a href="#">AAACGGGCTGCGGTGGCACATCGCC</a>  |
| BT | Plbd1   | <a href="#">CACCGGCCAGCCAGAGCGACCCAAC</a>  | <a href="#">AAACGTTGGGTCGCTCTGGCTGGCC</a>  |
| BU | Anpep   | <a href="#">CACCGTCTGTGGTGGTCTACGCTC</a>   | <a href="#">AAACGAGCGTAGACCACCGACAGAC</a>  |
| BV | Anpep   | <a href="#">CACCGGAGGTGCTGCCCCGGGAGCGT</a> | <a href="#">AAACACGCTCCCGGGCAGCACCTCC</a>  |
| BW | Tbc1d8  | <a href="#">CACCGTTCGTCTTGACAGCGGCGCCG</a> | <a href="#">AAACCGGCGCCGCTGCAAGACGAAC</a>  |
| BX | Tbc1d8  | <a href="#">CACCGGGCGCCGCGGGCACGGCGAG</a>  | <a href="#">AAACCTCGCCGTGCCCGCGGCGCCC</a>  |
| BY | Epsti1  | <a href="#">CACCGTCCATCTCTCGGGACCACGC</a>  | <a href="#">AAACGCGTGGTCCCGAGAGATGGAC</a>  |
| BZ | Epsti1  | <a href="#">CACCGGACCATGTACACCCGACAGTA</a> | <a href="#">AAACTACTGCGGGTGTACATGGTCC</a>  |
| CA | Clu     | <a href="#">CACCGGAGATTGAGAACGCCGTCC</a>   | <a href="#">AAACGGACGGCGTTCTGAATCTCCC</a>  |
| CB | Clu     | <a href="#">CACCGCAAGGACTTGCGCTCTGCGT</a>  | <a href="#">AAACACGCAGAGCGCAAGTCCTTGC</a>  |
| CC | WDFY1   | <a href="#">CACCGCGGCGTGATCACCGCTAGCG</a>  | <a href="#">AAACCGCTAGCGGTGATCACGCCGC</a>  |
| CD | WDFY1   | <a href="#">CACCGTGATCACCGCTAGCGAGGAC</a>  | <a href="#">AAACGTCCTCGCTAGCGGTGATCAC</a>  |
| CE | WDFY2   | <a href="#">CACCGTGGATCTCCGCCCATCGG</a>    | <a href="#">AAACCCGATGGCGGCGGAGATCCAC</a>  |
| CF | WDFY2   | <a href="#">CACCGGGGTGTCATCAGCGTCTCGG</a>  | <a href="#">AAACCCGAGACGCTGATGACACCCC</a>  |
| CG | WDFY3   | <a href="#">CACCGTAGGCCTGATGCACCTCCGC</a>  | <a href="#">AAACGCGGAGGTGCATCAGGCCTAC</a>  |
| CH | WDFY3   | <a href="#">CACCGAGCCCGCAAGACAACGCCTT</a>  | <a href="#">AAACAAGGCGTTGTCTTGCGGGCTC</a>  |
| CI | P2ry14  | <a href="#">CACCGCATTCCCGTGTGTACGGTA</a>   | <a href="#">AAACTACCGTACAACACGGGAATGC</a>  |
| CJ | P2ry14  | <a href="#">CACCGACGGTATGGTCTTCATCACG</a>  | <a href="#">AAACCGTGATGAAGACCATAACCGTC</a> |
| CK | Fnip2   | <a href="#">CACCGTCTCTTGGGCGGCCGGCCCT</a>  | <a href="#">AAACAGGCCCGGCCGCCAAGGAGC</a>   |

|    |        |                           |                            |
|----|--------|---------------------------|----------------------------|
| CL | Fnip2  | CACCGCCGGCTCCTCCTGGGCGGC  | AAACGCCGCCCAAGGAGGAGCCGGC  |
| CM | Fmnl2  | CACCGGGAGCGCTTTGCCATCGTGC | AAACGCACGATGGCAAAGCGTCCC   |
| CN | Fmnl2  | CACCGCACGTTGTGCGCCTTCAAAT | AAACATTTCAAGGCGCACAAACGTGC |
| CO | Ppap2a | CACCGCAAGACGCGGCTGCCGTACG | AAACCGTACGGCAGCCGCGTCTTGC  |
| CP | Ppap2a | CACCGCAGCCGCGTCTTGTCAACA  | AAACTGTTGACAAGACGCGGCTGC   |

**Table S2: sgRNA sequences used in this study**

sgRNA were designed using MIT CRISPR Design Tool (85). Blue nucleotides indicated cloning sites

| Sample | Proteins Enriched (2/3) |        |        |         |        |        |         |        |         |        |        |          |          |          |         |       |         |          |        |        |           |          |         |         |         |         |       |
|--------|-------------------------|--------|--------|---------|--------|--------|---------|--------|---------|--------|--------|----------|----------|----------|---------|-------|---------|----------|--------|--------|-----------|----------|---------|---------|---------|---------|-------|
| FL1    | Actbl2                  | Actl6a | Aifm2  | Arpc1b  | Arpc5  | Atp5j  | Bag6    | Card9  | Cpsf6   | Dctn4  | Dgat1  | Dhrs7b   | Eif3g    | Ganab    | Hdac6   | Mapk6 | Mroh1   | Nomo1    | Nup160 | Pfkfb3 | Psmid4    | Ran      | Rps25   | Sort1   | Tmed9   | Vps50   | Wdfy4 |
| FL2    | Actbl2                  | Actl6a | Actr3  | Aifm2   | Arpc2  | Atg13  | Atp5j   | Bag6   | Cd44    | Cers2  | Clta   | Dctn4    | Ddx23    | Fip1l1   | Ganab   | Gvin1 | Hdac6   | Hspa1b   | Hspa2  | Hspa8  | IgG1_bovi | Kif5c    | Lrch4   | Mroh1   | Mybbp1a | Myo1d   | NtSc2 |
|        | Pabpc1                  | Pfkfb3 | Pls3   | Psmid11 | Psmid8 | Rps19  | S100a4  | Sf3b3  | Smarcd1 | Sort1  | Spin1  | Tfrc     | Thrap3   | Trappc8  | Ulk1    | Vps41 | Vwa8    | Wdfy4    |        |        |           |          |         |         |         |         |       |
|        | Myo1c                   | Myo5a  | Myo6   | Pfkfb3  | Plec   | Ppp1ca | Ppp1r18 | Sept11 | Siglec1 | Snrpd2 | Sort1  | Sptbn1   | Tcirg1   | Tpm1     | Tpm2    | Tpm3  | Wdfy4   |          |        |        |           |          |         |         |         |         |       |
| FL3    | Acta2                   | Actb   | Actbl2 | Actn1   | Actn4  | Actr3  | Ahnak2  | Ap2b1  | Arhgap9 | Arpc2  | Arpc4  | Atp6v0a1 | Atp6v0d1 | Atp6v0d2 | Atp6v1f | Cald1 | Clta    | Cltc     | Cpsf6  | Iqgap1 | Lima1     | Lsp1     | Myh11   | Myh9    | Myl12a  | Myl12b  | My16  |
| FL4    | Abcd2                   | Acap2  | Acta2  | Actb    | Actbl2 | Actl6a | Actn4   | Actr3  | Adm     | Ahnak  | Ahnak2 | Ap2a1    | Ap2a2    | Ap2b1    | Apobr   | Araf  | Arfgef2 | Arhgap9  | Arpc2  | Arpc4  | Atp6v0d1  | Atp6v0d2 | Atp6v1a | Atp6v1f | Bag6    | Cald1   | Calm2 |
|        | Ccdc88a                 | Cct3   | Cct6a  | Cd44    | Cd68   | Cfl2   | Chil4   | Clns1a | Clta    | Cltc   | Copg2  | D1Pas1   | Dhrs7b   | Dnaja1   | Efh2    | Ganab | Hcls1   | Hsp90ab1 | Hspa1b | Hspa2  | Hspa5     | Hspa8    | Hyou1   | Iqgap1  | Kif5c   | Lima1   | Lsp1  |
|        | Mpc2                    | Mpeg1  | Mroh1  | Msn     | Myh10  | Myh11  | Myh9    | Myl12a | Myl12b  | Myl6   | Myl6b  | Myo1c    | Myo1e    | Myo1f    | Plec    | Plod3 | Ppp1ca  | Psm1     | Psm4   | Rpl24  | Rplp1     | Rps27a   | Sdhd    | Sec61a1 | Sfxn3   | Siglec1 | Sort1 |
|        | Stip1                   | Tcirg1 | Tcp1   | Thy1    | Tmed9  | Tpm3   | Txn     | Uqcrc1 | Vps13c  | Vps53  | Wdfy4  |          |          |          |         |       |         |          |        |        |           |          |         |         |         |         |       |

### Table S3: Proteins enriched in mass spectrometry

List of proteins found enriched at least 2-fold of control samples in at least two of three mass spectrometry runs

| SUID | % Associated Genes | Associated Genes Found                                                                                                                                                                                                | GOID       | GO Term                                     | Group PValue                   | Nr. Genes | Term PValue |
|------|--------------------|-----------------------------------------------------------------------------------------------------------------------------------------------------------------------------------------------------------------------|------------|---------------------------------------------|--------------------------------|-----------|-------------|
| 2427 | 1.388888836        | [Actr3, Arpc1b, Arpc2, Arpc5, Hdac6, Hspa1b, Hspa8, Pls3]                                                                                                                                                             | GO:0097435 | supramolecular fiber organization           | {Group2=7.689871029925464E-5}  | 8         | 5.34E-04    |
| 2428 | 1.134644508        | [Actr3, Arpc1b, Arpc2, Arpc5, Clta, Cpsf6, Hdac6, Hspa1b, Hspa8, Psm11, Psm4, Psm8, Rps19, Ulk1, Vps41]                                                                                                               | GO:0071822 | protein complex subunit organization        | {Group2=7.689871029925464E-5}  | 15        | 1.45E-05    |
| 2429 | 0.994694948        | [Actr3, Arpc1b, Arpc2, Arpc5, Clta, Cpsf6, Dgat1, Hdac6, Hspa1b, Psm11, Psm4, Psm8, Rps19, Ulk1, Vps41]                                                                                                               | GO:0065003 | macromolecular complex assembly             | {Group2=7.689871029925464E-5}  | 15        | 6.78E-05    |
| 2430 | 0.749375522        | [Actl6a, Actr3, Atg13, Bag6, Clta, Dctn4, Hdac6, Hspa8, Kif5c, Mybbp1a, Myo1d, Nup160, Psm8, Ran, Sort1, Tmed9, Vps41, Vps50]                                                                                         | GO:0051641 | cellular localization                       | {Group1=6.057261404642146E-4}  | 18        | 6.06E-04    |
| 2431 | 0.980392158        | [Actl6a, Atg13, Clta, Dctn4, Hdac6, Hspa8, Kif5c, Mybbp1a, Myo1d, Nup160, Psm8, Ran, Sort1, Vps41, Vps50]                                                                                                             | GO:0046907 | intracellular transport                     | {Group1=6.057261404642146E-4}  | 15        | 8.00E-05    |
| 2432 | 0.755857885        | [Actr3, Arpc1b, Arpc2, Arpc5, Atg13, Bag6, Clta, Cpsf6, Dgat1, Hdac6, Hspa1b, Hspa2, Pls3, Psm11, Psm4, Psm8, Ran, Rps19, Ulk1, Vps41]                                                                                | GO:0044085 | cellular component biogenesis               | {Group2=7.689871029925464E-5}  | 20        | 2.22E-04    |
| 2433 | 0.99765259         | [Actr3, Arpc1b, Arpc2, Arpc5, Clta, Cpsf6, Dgat1, Hdac6, Hspa1b, Hspa8, Psm11, Psm4, Psm8, Rps19, Smarcd1, Ulk1, Vps41]                                                                                               | GO:0043933 | macromolecular complex subunit organization | {Group2=7.689871029925464E-5}  | 17        | 1.80E-05    |
| 2434 | 1.357466102        | [Actr3, Arpc1b, Arpc2, Arpc5, Clta, Hdac6, Hspa1b, Psm11, Psm4, Psm8, Rps19, Vps41]                                                                                                                                   | GO:0034622 | cellular macromolecular complex assembly    | {Group2=7.689871029925464E-5}  | 12        | 2.22E-05    |
| 2435 | 0.579547584        | [Actl6a, Actr3, Aifm2, Arpc1b, Arpc2, Arpc5, Atg13, Bag6, Cd44, Cers2, Clta, Cpsf6, Dgat1, Hdac6, Hspa1b, Hspa2, Hspa8, Kif5c, Mapk6, Pls3, Psm11, Psm4, Psm8, Ran, Rps19, Smarcd1, Sort1, Spin1, Tmed9, Ulk1, Vps41] | GO:0016043 | cellular component organization             | {Group0=1.8401552771690126E-4} | 31        | 1.84E-04    |

**Table S4: GO Terms for FL1/FL2 fragments**

Enriched GO terms generated by ClueGO for proteins enriched in FL1 and FL2 samples after mass spectrometry





**Table S5: Go Terms for FL3/FL4 fragments**

Enriched GO terms generated by ClueGO for proteins enriched in FL3 and FL4 samples after mass spectrometry

| Gene Symbol | Sum Intensity MT | Sum Intensity FL-4 |  | Gene Symbol | Sum Intensity MT | Sum Intensity FL-4 |  | Gene Symbol | Sum Intensity MT | Sum Intensity FL-4 |  | Gene Symbol | Sum Intensity MT | Sum Intensity FL-4 |
|-------------|------------------|--------------------|--|-------------|------------------|--------------------|--|-------------|------------------|--------------------|--|-------------|------------------|--------------------|
| Actb        | 6.20E+09         | 7.60E+10           |  | Psmc2       | 1.10E+07         | 8.70E+06           |  | Prpf8       | 1.00E+06         | 1.70E+06           |  | Ccdc22      | NF               | 2.20E+05           |
| Acta2       | 1.20E+09         | 7.00E+09           |  | Eif3e       | 5.10E+06         | 8.70E+06           |  | Jak1        | 3.50E+06         | 1.70E+06           |  | Srp72       | NF               | 2.20E+05           |
| Wdfy4       | 1.30E+05         | 1.60E+09           |  | Dnajb11     | 3.70E+06         | 8.70E+06           |  | Eif3g       | 2.20E+06         | 1.70E+06           |  | Scarb2      | NF               | 2.20E+05           |
| Stk38       | 1.80E+09         | 1.60E+09           |  | Psmc4       | 5.30E+05         | 8.60E+06           |  | Ap2a1       | NF               | 1.70E+06           |  | Nduf57      | NF               | 2.20E+05           |
| Myh9        | 1.30E+08         | 1.20E+09           |  | Hadhb       | 7.50E+06         | 8.50E+06           |  | Psmc4       | 2.10E+06         | 1.70E+06           |  | Tmed2       | NF               | 2.10E+05           |
| Mthfd11     | 1.50E+09         | 1.10E+09           |  | Naglu       | 1.50E+07         | 8.40E+06           |  | Atp6v1d     | 5.10E+05         | 1.70E+06           |  | Clcc1       | NF               | 2.10E+05           |
| Prmt5       | 1.20E+09         | 1.10E+09           |  | Actr1b      | 9.60E+06         | 8.40E+06           |  | Tuba4a      | 7.40E+05         | 1.70E+06           |  | Rplp1       | NF               | 2.10E+05           |
| Eif4b       | 1.10E+09         | 7.80E+08           |  | Capza1      | 1.40E+07         | 8.20E+06           |  | Atp6v0a1    | NF               | 1.70E+06           |  | Rps6        | 2.70E+05         | 1.90E+05           |
| Ighg1       | 6.40E+08         | 6.80E+08           |  | Sfn         | 2.80E+06         | 8.20E+06           |  | Hnrmp1      | 3.00E+06         | 1.60E+06           |  | Ywhab       | 5.60E+04         | 1.90E+05           |
| KV2A7       | 4.40E+08         | 6.50E+08           |  | Eif3m       | 7.60E+06         | 8.10E+06           |  | Ywhaz       | 1.60E+06         | 1.60E+06           |  | Tpm4        | NF               | 1.80E+05           |
| Hspa8       | 2.30E+07         | 6.10E+08           |  | Eif3l       | 6.60E+06         | 8.00E+06           |  | Atp6v1f     | NF               | 1.60E+06           |  | Rpl14       | NF               | 1.80E+05           |
| Flna        | 3.00E+08         | 5.70E+08           |  | Psmc12      | 1.00E+07         | 7.90E+06           |  | Alyref2     | 9.50E+05         | 1.60E+06           |  | Thy1        | NF               | 1.80E+05           |
| Vcp         | 3.90E+08         | 5.40E+08           |  | Ahnak2      | 3.70E+06         | 7.80E+06           |  | Snrpe       | 6.10E+05         | 1.60E+06           |  | Hspa4       | 1.00E+05         | 1.70E+05           |
| Tuba1a      | 2.70E+08         | 4.30E+08           |  | Psmc4       | 7.20E+06         | 7.70E+06           |  | Vps16       | 1.90E+06         | 1.50E+06           |  | Bag6        | NF               | 1.70E+05           |
| Atp5b       | 2.60E+08         | 4.20E+08           |  | Atp5f1      | 9.20E+06         | 7.60E+06           |  | Psmc4       | 5.20E+06         | 1.50E+06           |  | Kdm1a       | 5.10E+04         | 1.60E+05           |
| Wdr77       | 4.80E+08         | 4.20E+08           |  | Psmc3       | 4.20E+06         | 7.60E+06           |  | Itgb2       | 2.00E+06         | 1.50E+06           |  | Arfgef2     | NF               | 1.60E+05           |
| Atp5a1      | 1.60E+08         | 3.40E+08           |  | Sdha        | 2.80E+06         | 7.50E+06           |  | Sept9       | 1.30E+07         | 1.50E+06           |  | Samhd1      | 2.30E+05         | 1.50E+05           |
| Tubb3       | 1.80E+08         | 3.30E+08           |  | Tyms        | 6.00E+06         | 7.40E+06           |  | Rbbp4       | 2.00E+06         | 1.50E+06           |  | Aldh3a2     | 2.60E+05         | 1.40E+05           |
| Hspa5       | 1.10E+08         | 2.30E+08           |  | Rrbp1       | 1.90E+06         | 7.30E+06           |  | Ndufa13     | NF               | 1.50E+06           |  | Mic13       | NF               | 1.40E+05           |
|             |                  |                    |  |             |                  |                    |  |             |                  |                    |  |             |                  |                    |

|              |              |              |  |         |              |              |  |               |              |              |  |              |              |              |  |         |              |    |
|--------------|--------------|--------------|--|---------|--------------|--------------|--|---------------|--------------|--------------|--|--------------|--------------|--------------|--|---------|--------------|----|
| Myl6         | 2.60E+0<br>7 | 2.20E+0<br>8 |  | Hcls1   | 2.60E+0<br>6 | 7.30E+0<br>6 |  | Hsp90b1       | 2.40E+0<br>6 | 1.40E+0<br>6 |  | Smc1a        | 3.20E+0<br>5 | 1.30E+0<br>5 |  | lkbkb   | 1.70E+0<br>5 | NF |
| Ankfy1       | 2.10E+0<br>8 | 2.10E+0<br>8 |  | Gpnm    | 6.90E+0<br>6 | 7.30E+0<br>6 |  | Kpnb1         | 1.20E+0<br>6 | 1.40E+0<br>6 |  | Rps5         | 8.30E+0<br>5 | 1.30E+0<br>5 |  | Hnrnpab | 1.60E+0<br>5 | NF |
| Gsn          | 7.40E+0<br>7 | 2.10E+0<br>8 |  | Canx    | 6.90E+0<br>6 | 7.20E+0<br>6 |  | Sec61a1       | 5.00E+0<br>5 | 1.40E+0<br>6 |  | Slc8b1       | NF           | 1.30E+0<br>5 |  | Gatad2b | NF           | NF |
| Tubb5        | 1.30E+0<br>8 | 2.00E+0<br>8 |  | Sdf2l1  | 4.40E+0<br>6 | 7.20E+0<br>6 |  | Psmb6         | 9.40E+0<br>6 | 1.40E+0<br>6 |  | Atxn10       | 2.50E+0<br>5 | 1.20E+0<br>5 |  | Ndufa8  | NF           | NF |
| Eef1a1       | 1.00E+0<br>8 | 1.80E+0<br>8 |  | Mccc2   | 7.40E+0<br>6 | 7.10E+0<br>6 |  | Ran           | NF           | 1.40E+0<br>6 |  | Sec31a       | NF           | 1.20E+0<br>5 |  | Ybx1    | 1.40E+0<br>5 | NF |
| Tubb2b       | 7.80E+0<br>7 | 1.70E+0<br>8 |  | Rbm3    | 3.60E+0<br>6 | 6.90E+0<br>6 |  | Clta          | NF           | 1.40E+0<br>6 |  | Gcn1         | NF           | 1.10E+0<br>5 |  | Marco   | 2.10E+0<br>5 | NF |
| Myl12b       | 1.60E+0<br>7 | 1.50E+0<br>8 |  | Calu    | 6.70E+0<br>6 | 6.80E+0<br>6 |  | Rps28         | NF           | 1.40E+0<br>6 |  | Tom1         | NF           | 1.00E+0<br>5 |  | Ap2m1   | NF           | NF |
| Myh10        | 1.70E+0<br>7 | 1.50E+0<br>8 |  | Slc25a1 | 6.10E+0<br>6 | 6.70E+0<br>6 |  | Fasn          | 3.00E+0<br>6 | 1.30E+0<br>6 |  | Eif2s3y      | 9.30E+0<br>5 | 9.30E+0<br>4 |  | Tmem165 | NF           | NF |
| IGKC         | 2.10E+0<br>8 | 1.50E+0<br>8 |  | Ssr4    | 7.10E+0<br>6 | 6.70E+0<br>6 |  | Myo18a        | 2.20E+0<br>6 | 1.30E+0<br>6 |  | Smarcd1      | NF           | 9.20E+0<br>4 |  | Erh     | 9.10E+0<br>4 | NF |
| Tubb4a       | 2.60E+0<br>7 | 1.30E+0<br>8 |  | Rps10   | 7.30E+0<br>6 | 6.70E+0<br>6 |  | Lima1         | NF           | 1.30E+0<br>6 |  | Cdc42bp<br>b | NF           | 9.20E+0<br>4 |  | Gid8    | NF           | NF |
| Tmod3        | 2.10E+0<br>8 | 1.20E+0<br>8 |  | Psm3    | 1.10E+0<br>7 | 6.60E+0<br>6 |  | Arl1          | 1.20E+0<br>6 | 1.30E+0<br>6 |  | Wdr7         | NF           | 8.90E+0<br>4 |  | Isoc2a  | 1.10E+0<br>5 | NF |
| Vim          | 6.20E+0<br>7 | 1.20E+0<br>8 |  | Uqcr2   | 1.30E+0<br>6 | 6.60E+0<br>6 |  | Actn1         | NF           | 1.30E+0<br>6 |  |              | 6.70E+0<br>4 | 8.50E+0<br>4 |  | Npm1    | NF           | NF |
| Ppib         | 5.20E+0<br>7 | 1.10E+0<br>8 |  | Slain2  | 6.70E+0<br>6 | 6.60E+0<br>6 |  | Cd68          | NF           | 1.30E+0<br>6 |  | Ldha         | NF           | 8.10E+0<br>4 |  | Ndufb10 | 3.60E+0<br>5 | NF |
| Ighg1        | 1.30E+0<br>8 | 1.10E+0<br>8 |  | Rps18   | 4.80E+0<br>6 | 6.50E+0<br>6 |  | Rpl31         | 3.30E+0<br>5 | 1.30E+0<br>6 |  | Washc2       | NF           | 7.70E+0<br>4 |  | Dhcr7   | 1.60E+0<br>5 | NF |
| Slc25a5      | 3.40E+0<br>7 | 1.00E+0<br>8 |  | Ap2b1   | 2.00E+0<br>5 | 6.30E+0<br>6 |  | Cfl2          | NF           | 1.30E+0<br>6 |  | Pcyt1a       | NF           | 7.70E+0<br>4 |  | Washc4  | 1.20E+0<br>5 | NF |
| Flii         | 6.40E+0<br>7 | 9.90E+0<br>7 |  | Alb     | 4.10E+0<br>6 | 6.30E+0<br>6 |  | Eif2b5        | 1.30E+0<br>6 | 1.20E+0<br>6 |  | Cpsf2        | NF           | 6.40E+0<br>4 |  | Rps15a  | NF           | NF |
| Cltc         | NF           | 9.70E+0<br>7 |  | Lrp1    | 1.30E+0<br>7 | 6.20E+0<br>6 |  | Eif2b4        | 1.20E+0<br>6 | 1.20E+0<br>6 |  | Mtd5         | NF           | 6.40E+0<br>4 |  | Eif2s2  | 3.50E+0<br>5 | NF |
| Cct3         | 3.20E+0<br>7 | 9.30E+0<br>7 |  | Myof    | 4.70E+0<br>6 | 6.20E+0<br>6 |  | Hnrnpa2b<br>1 | 3.20E+0<br>5 | 1.20E+0<br>6 |  | Stt3a        | NF           | 5.40E+0<br>4 |  | Ndufb5  | NF           | NF |
| Hspa2        | 7.80E+0<br>6 | 9.10E+0<br>7 |  | Rock2   | 2.80E+0<br>6 | 6.00E+0<br>6 |  | Pycr2         | NF           | 1.20E+0<br>6 |  | Lrrk2        | NF           | 3.70E+0<br>4 |  | Des     | NF           | NF |
| Hsp90ab<br>1 | 9.20E+0<br>6 | 8.70E+0<br>7 |  | Eif2s1  | 5.70E+0<br>6 | 6.00E+0<br>6 |  | Eif2ak3       | 2.90E+0<br>6 | 1.10E+0<br>6 |  | Araf         | NF           | 2.50E+0<br>4 |  | Syng1   | NF           | NF |
| Slc25a4      | 7.50E+0<br>7 | 8.30E+0<br>7 |  | Arcn1   | 6.40E+0<br>6 | 5.90E+0<br>6 |  | Dctn2         | 3.70E+0<br>6 | 1.10E+0<br>6 |  | Stom         | NF           | 1.90E+0<br>4 |  | Tpm3    | NF           | NF |
| Prpf31       | 1.20E+0<br>8 | 8.10E+0<br>7 |  | Eif3h   | 7.60E+0<br>6 | 5.80E+0<br>6 |  | Qpct1         | 3.20E+0<br>6 | 1.10E+0<br>6 |  | GFP          | NF           | NF           |  | Tpm2    | NF           | NF |
| Tuba1c       | 4.00E+0<br>7 | 8.10E+0<br>7 |  | Myo1c   | 1.10E+0<br>6 | 5.70E+0<br>6 |  | Glud1         | 1.30E+0<br>6 | 1.10E+0<br>6 |  | Snrnp20<br>0 | 2.00E+0<br>6 | NF           |  | Pls1    | NF           | NF |
| Cct8         | 3.10E+0<br>7 | 7.40E+0<br>7 |  | Anxa1   | 4.50E+0<br>6 | 5.70E+0<br>6 |  | Ruvbl2        | 7.10E+0<br>5 | 1.10E+0<br>6 |  | Colgalt1     | 2.40E+0<br>6 | NF           |  | Atg13   | NF           | NF |

|          |              |              |  |           |              |              |  |         |              |              |  |          |              |    |  |         |              |    |
|----------|--------------|--------------|--|-----------|--------------|--------------|--|---------|--------------|--------------|--|----------|--------------|----|--|---------|--------------|----|
| Cct6a    | 2.80E+0<br>7 | 7.30E+0<br>7 |  | Hspd1     | 3.10E+0<br>6 | 5.60E+0<br>6 |  | Atp5j   | NF           | 1.10E+0<br>6 |  | Phb2     | 7.00E+0<br>5 | NF |  | Ppp1r18 | NF           | NF |
| Cct2     | 4.30E+0<br>7 | 7.20E+0<br>7 |  | Msn       | 2.70E+0<br>6 | 5.60E+0<br>6 |  | Atp6v1h | 6.70E+0<br>5 | 1.10E+0<br>6 |  | Ruvb1l   | 2.70E+0<br>6 | NF |  | Rpl22   | 3.70E+0<br>5 | NF |
| Ahnak    | 1.00E+0<br>7 | 6.90E+0<br>7 |  | Arpc4     | 2.40E+0<br>5 | 5.60E+0<br>6 |  | Camk2d  | NF           | 1.10E+0<br>6 |  | Eftud2   | 1.00E+0<br>6 | NF |  | Rab5b   | NF           | NF |
| Flnc     | 5.30E+0<br>7 | 6.80E+0<br>7 |  | Isg15     | 1.80E+0<br>6 | 5.50E+0<br>6 |  | Eif2b1  | 1.80E+0<br>6 | 1.00E+0<br>6 |  | Rb1cc1   | 9.80E+0<br>5 | NF |  | Trappc4 | 2.10E+0<br>5 | NF |
| Iqgap1   | 6.80E+0<br>6 | 6.60E+0<br>7 |  | Lpcat3    | 4.20E+0<br>6 | 5.50E+0<br>6 |  | Ndufa9  | 1.10E+0<br>6 | 1.00E+0<br>6 |  | Eno1     | NF           | NF |  | Pcca    | 2.20E+0<br>5 | NF |
| Actn4    | 3.50E+0<br>5 | 6.40E+0<br>7 |  | Psma7     | 8.80E+0<br>6 | 5.40E+0<br>6 |  | Lasp1   | 1.80E+0<br>5 | 9.90E+0<br>5 |  | Ccar1    | 1.00E+0<br>6 | NF |  | Gatad2a | 3.00E+0<br>5 | NF |
| Thrap3   | 6.40E+0<br>7 | 6.20E+0<br>7 |  | Psma5     | 3.40E+0<br>6 | 5.40E+0<br>6 |  | Mtstp8  | 1.30E+0<br>6 | 9.80E+0<br>5 |  | Mob1b    | 5.40E+0<br>6 | NF |  | Ifit1   | NF           | NF |
| Tcp1     | 2.70E+0<br>7 | 5.90E+0<br>7 |  | Mpeg1     | NF           | 5.40E+0<br>6 |  | Ctsd    | 1.50E+0<br>6 | 9.40E+0<br>5 |  | Aldh2    | 1.60E+0<br>6 | NF |  | Lnp     | 3.60E+0<br>4 | NF |
| Ivns1abp | 3.10E+0<br>7 | 5.40E+0<br>7 |  | Hist1h2ad | 2.90E+0<br>6 | 5.40E+0<br>6 |  | PRAG1   | 3.80E+0<br>6 | 9.10E+0<br>5 |  | Ttc7b    | 8.40E+0<br>5 | NF |  | Atad3   | NF           | NF |
| Hspa1b   | 6.40E+0<br>6 | 5.40E+0<br>7 |  | Myo1e     | 2.10E+0<br>6 | 5.20E+0<br>6 |  | Uqcrfs1 | 1.10E+0<br>6 | 9.10E+0<br>5 |  | Pfkfb3   | 1.40E+0<br>5 | NF |  | Fbl     | NF           | NF |
| Hnrmpk   | 4.40E+0<br>7 | 5.30E+0<br>7 |  | Psmd13    | 1.20E+0<br>6 | 5.00E+0<br>6 |  | Git2    | 6.30E+0<br>5 | 9.10E+0<br>5 |  | Sort1    | 6.50E+0<br>5 | NF |  | Ikbkap  | NF           | NF |
| Txn      | 2.10E+0<br>7 | 4.70E+0<br>7 |  | Arpc2     | NF           | 5.00E+0<br>6 |  | Spata31 | NF           | 8.90E+0<br>5 |  | Nomo1    | 1.40E+0<br>6 | NF |  | Rpl19   | 6.80E+0<br>4 | NF |
| Eif3b    | 1.50E+0<br>7 | 4.60E+0<br>7 |  | Stip1     | NF           | 5.00E+0<br>6 |  | Psma1   | 5.10E+0<br>6 | 8.50E+0<br>5 |  | Dock4    | 6.60E+0<br>5 | NF |  | Spag9   | 8.80E+0<br>4 | NF |
| Hspa9    | 2.50E+0<br>7 | 4.30E+0<br>7 |  | Ssr1      | 2.20E+0<br>6 | 4.90E+0<br>6 |  | Ccdc88a | 3.20E+0<br>5 | 8.50E+0<br>5 |  | Gvin1    | 2.70E+0<br>5 | NF |  | Rhog    | NF           | NF |
| Myh11    | 7.00E+0<br>6 | 3.90E+0<br>7 |  | Rac2      | 2.00E+0<br>6 | 4.90E+0<br>6 |  | Vps53   | NF           | 8.40E+0<br>5 |  | Dock10   | 4.70E+0<br>5 | NF |  | Ddx23   | NF           | NF |
| Stk38l   | 7.00E+0<br>7 | 3.80E+0<br>7 |  | Ina       | NF           | 4.90E+0<br>6 |  | Ccr1    | 1.90E+0<br>6 | 8.30E+0<br>5 |  | Ndufv1   | 6.70E+0<br>5 | NF |  | Fam47e  | 1.20E+0<br>5 | NF |
| Cct5     | 2.00E+0<br>7 | 3.60E+0<br>7 |  | Ezr       | 3.60E+0<br>6 | 4.80E+0<br>6 |  | S100a10 | 1.00E+0<br>6 | 8.20E+0<br>5 |  | Map3k7   | 1.40E+0<br>5 | NF |  | Ndufs4  | 2.70E+0<br>5 | NF |
| Lrrfip1  | 1.80E+0<br>7 | 3.40E+0<br>7 |  | Capzb     | 1.90E+0<br>7 | 4.70E+0<br>6 |  | Tmc5    | NF           | 8.10E+0<br>5 |  | Tubb6    | 3.30E+0<br>6 | NF |  | Lman1   | 1.40E+0<br>5 | NF |
| Cct4     | 1.40E+0<br>7 | 3.10E+0<br>7 |  | Rps27     | 2.20E+0<br>6 | 4.70E+0<br>6 |  | Hyou1   | 7.60E+0<br>5 | 8.00E+0<br>5 |  | Psmb7    | 5.00E+0<br>5 | NF |  | Eif5a2  | NF           | NF |
| Acot9    | 4.70E+0<br>7 | 3.10E+0<br>7 |  | Eif3c     | 7.50E+0<br>6 | 4.60E+0<br>6 |  | Fth1    | NF           | 8.00E+0<br>5 |  | Tln1     | NF           | NF |  | Vps52   | 2.10E+0<br>5 | NF |
| Erh      | 2.90E+0<br>7 | 3.10E+0<br>7 |  | Glyr1     | 2.90E+0<br>6 | 4.60E+0<br>6 |  | Pls3    | NF           | 7.90E+0<br>5 |  | Lgals3bp | 1.40E+0<br>6 | NF |  | Commnd9 | 7.10E+0<br>4 | NF |
| Plod3    | 1.00E+0<br>7 | 3.00E+0<br>7 |  | Ppm1a     | 9.10E+0<br>5 | 4.60E+0<br>6 |  | Rcn2    | 8.20E+0<br>5 | 7.70E+0<br>5 |  | Prdx4    | NF           | NF |  | Vps8    | NF           | NF |
| Atp5o    | 1.40E+0<br>7 | 2.90E+0<br>7 |  | Atp6v1e1  | 2.60E+0<br>6 | 4.60E+0<br>6 |  | Sf3b1   | 1.00E+0<br>5 | 7.60E+0<br>5 |  | Sept8    | 1.50E+0<br>5 | NF |  | Tlr3    | 1.30E+0<br>5 | NF |
| Ppm1b    | 1.70E+0<br>7 | 2.80E+0<br>7 |  | Actr3     | NF           | 4.50E+0<br>6 |  | Cald1   | NF           | 7.60E+0<br>5 |  | Nup160   | 1.50E+0<br>5 | NF |  | Exoc5   | NF           | NF |

|          |              |              |  |          |              |              |  |         |              |              |  |          |              |    |  |               |              |    |
|----------|--------------|--------------|--|----------|--------------|--------------|--|---------|--------------|--------------|--|----------|--------------|----|--|---------------|--------------|----|
| Arf5     | 1.70E+0<br>7 | 2.80E+0<br>7 |  | Hnrnpf   | 2.30E+0<br>6 | 4.50E+0<br>6 |  | Fip1l1  | NF           | 7.40E+0<br>5 |  | Eif2b2   | 1.60E+0<br>6 | NF |  | Klc4          | NF           | NF |
| Myo1g    | 8.30E+0<br>5 | 2.70E+0<br>7 |  | Arhgdia  | NF           | 4.50E+0<br>6 |  | Adrm1   | 6.80E+0<br>5 | 7.40E+0<br>5 |  | Capzb    | 2.00E+0<br>6 | NF |  | Rras          | NF           | NF |
| Cct7     | 1.60E+0<br>7 | 2.70E+0<br>7 |  | Pon2     | 2.30E+0<br>6 | 4.40E+0<br>6 |  | Eppk1   | NF           | 7.40E+0<br>5 |  | Vdac2    | NF           | NF |  | Psmb9         | 1.80E+0<br>5 | NF |
| Tab1     | 1.80E+0<br>7 | 2.60E+0<br>7 |  | Psma3    | 1.60E+0<br>6 | 4.40E+0<br>6 |  | Actl6a  | NF           | 7.30E+0<br>6 |  | Ganab    | NF           | NF |  | Atp6v0c       | NF           | NF |
| Myl6b    | 3.40E+0<br>6 | 2.60E+0<br>7 |  | Rps27a   | NF           | 4.40E+0<br>6 |  | Huwe1   | 1.20E+0<br>6 | 7.20E+0<br>5 |  | Actr10   | 5.40E+0<br>5 | NF |  | Smarcc2       | NF           | NF |
| Capza2   | 3.20E+0<br>7 | 2.50E+0<br>7 |  | Ap2a2    | NF           | 4.30E+0<br>6 |  | Hnrnp1  | 4.70E+0<br>5 | 7.20E+0<br>5 |  | Plek     | 9.10E+0<br>5 | NF |  | Cul1          | NF           | NF |
| Pi4ka    | 1.70E+0<br>7 | 2.40E+0<br>7 |  | Rpl24    | NF           | 4.30E+0<br>6 |  | Camk2a  | 3.10E+0<br>5 | 7.20E+0<br>5 |  | Pccb     | 6.20E+0<br>5 | NF |  | Ankrd50       | NF           | NF |
| Clns1a   | 1.80E+0<br>7 | 2.40E+0<br>7 |  | Psmb8    | 1.40E+0<br>6 | 4.20E+0<br>6 |  | Cdc42   | 9.20E+0<br>5 | 7.10E+0<br>5 |  | Cpsf1    | 3.10E+0<br>5 | NF |  | Twf1          | NF           | NF |
| Gapdh    | 1.30E+0<br>7 | 2.40E+0<br>7 |  | Psmd6    | 4.70E+0<br>6 | 4.10E+0<br>6 |  | Kdelr2  | 2.60E+0<br>5 | 6.90E+0<br>5 |  | Eif3k    | 1.80E+0<br>5 | NF |  | Wdr26         | NF           | NF |
| Hadha    | 2.40E+0<br>7 | 2.30E+0<br>7 |  | Myo5a    | NF           | 4.10E+0<br>6 |  | Nsf     | 9.30E+0<br>5 | 6.80E+0<br>5 |  | Hnrnpu   | 4.30E+0<br>5 | NF |  | Sptbn1        | NF           | NF |
| Mycbp    | 1.60E+0<br>7 | 2.30E+0<br>7 |  | Psmc6    | 7.80E+0<br>6 | 4.00E+0<br>6 |  | Timm50  | 4.80E+0<br>5 | 6.80E+0<br>5 |  | Smarca2  | NF           | NF |  | Mrps15        | 2.20E+0<br>5 | NF |
| Eef1d    | 1.40E+0<br>7 | 2.20E+0<br>7 |  | Sept2    | 3.90E+0<br>6 | 3.90E+0<br>6 |  | Gatd1   | 2.60E+0<br>5 | 6.80E+0<br>5 |  | Mob2     | 2.70E+0<br>6 | NF |  | Vps41         | NF           | NF |
| Psmd11   | 1.80E+0<br>7 | 2.10E+0<br>7 |  | Lgals1   | 1.70E+0<br>6 | 3.90E+0<br>6 |  | Spin1   | 1.10E+0<br>6 | 6.70E+0<br>5 |  | Tagln2   | 3.80E+0<br>5 | NF |  | Ndufa2        | 1.10E+0<br>5 | NF |
| Tufm     | 1.20E+0<br>7 | 2.10E+0<br>7 |  | Gigyf1   | NF           | 3.90E+0<br>6 |  | Eif2b3  | 1.20E+0<br>6 | 6.70E+0<br>5 |  | Gpx4     | 4.60E+0<br>5 | NF |  | Mrps26        | 1.10E+0<br>5 | NF |
| Chil3    | 9.10E+0<br>6 | 2.10E+0<br>7 |  | Fam126a  | 3.50E+0<br>6 | 3.80E+0<br>6 |  | Vps18   | 6.50E+0<br>5 | 6.70E+0<br>5 |  | Acp5     | 3.30E+0<br>6 | NF |  | Aldoa         | NF           | NF |
| Tcirg1   | NF           | 1.90E+0<br>7 |  | Atp6v0d1 | NF           | 3.80E+0<br>6 |  | Ywhag   | 4.00E+0<br>5 | 6.40E+0<br>5 |  | Rps24    | 6.40E+0<br>5 | NF |  | Dctn4         | NF           | NF |
| Eif3f    | 9.30E+0<br>6 | 1.90E+0<br>7 |  | Ndufa4   | 9.00E+0<br>6 | 3.80E+0<br>6 |  | Vps51   | NF           | 6.40E+0<br>5 |  | Ulk1     | 3.40E+0<br>5 | NF |  | Hdac6         | NF           | NF |
| Rpl38    | 1.90E+0<br>7 | 1.90E+0<br>7 |  | P4hb     | 4.30E+0<br>6 | 3.70E+0<br>6 |  | Trim21  | 3.10E+0<br>6 | 6.30E+0<br>5 |  | Hist1h1d | 2.20E+0<br>6 | NF |  | Slc37a2       | NF           | NF |
| Rps3     | 1.40E+0<br>7 | 1.80E+0<br>7 |  | Tpm3     | NF           | 3.70E+0<br>6 |  | Mroh1   | NF           | 6.30E+0<br>5 |  | Tmed10   | 6.60E+0<br>5 | NF |  | Rpsa          | 9.90E+0<br>4 | NF |
| Slc25a11 | 7.50E+0<br>6 | 1.70E+0<br>7 |  | Actr3b   | 3.90E+0<br>5 | 3.70E+0<br>6 |  | Adgre1  | 7.70E+0<br>5 | 6.20E+0<br>5 |  | Tpm1     | NF           | NF |  | Elmo1         | 1.20E+0<br>5 | NF |
| Acot10   | 2.10E+0<br>7 | 1.70E+0<br>7 |  | Ahnak2   | 6.00E+0<br>5 | 3.60E+0<br>6 |  | Arhgef6 | NF           | 6.20E+0<br>5 |  | Myo6     | NF           | NF |  | 4930430A15Rik | NF           | NF |
| Anxa2    | 7.80E+0<br>6 | 1.70E+0<br>7 |  | D1Pas1   | 4.90E+0<br>5 | 3.60E+0<br>6 |  | Efr3a   | 1.90E+0<br>5 | 6.10E+0<br>5 |  | Slc25a10 | 4.90E+0<br>5 | NF |  | Fis1          | 7.60E+0<br>4 | NF |
| Eef1b    | 1.80E+0<br>7 | 1.70E+0<br>7 |  | Atp6v0d2 | NF           | 3.50E+0<br>6 |  | Rnf213  | 4.70E+0<br>5 | 6.00E+0<br>5 |  | Ndufs3   | 6.30E+0<br>5 | NF |  | Rhot1         | 6.80E+0<br>4 | NF |
| Eif3a    | 1.90E+0<br>7 | 1.60E+0<br>7 |  | Fmn11    | 1.70E+0<br>6 | 3.40E+0<br>6 |  | Aifm2   | NF           | 5.90E+0<br>5 |  | Rps4x    | 3.30E+0<br>5 | NF |  | Mrps23        | 9.70E+0<br>4 | NF |

|          |              |              |  |          |              |              |  |        |              |              |  |          |              |    |  |          |              |    |
|----------|--------------|--------------|--|----------|--------------|--------------|--|--------|--------------|--------------|--|----------|--------------|----|--|----------|--------------|----|
| Atp6v1a  | 5.30E+0<br>6 | 1.60E+0<br>7 |  | Psm8     | 4.30E+0<br>6 | 3.40E+0<br>6 |  | Sbfl   | 3.10E+0<br>5 | 5.80E+0<br>5 |  | Hba      | NF           | NF |  | Rab38    | NF           | NF |
| Cct6b    | 5.60E+0<br>6 | 1.60E+0<br>7 |  | Dnaja2   | 2.10E+0<br>6 | 3.40E+0<br>6 |  | Ctsb   | NF           | 5.80E+0<br>5 |  | Afg3l2   | 3.30E+0<br>5 | NF |  | Pkm      | NF           | NF |
| Tpi1     | 8.00E+0<br>6 | 1.60E+0<br>7 |  | Hist1h1e | 1.20E+0<br>6 | 3.40E+0<br>6 |  | Taf4   | 9.40E+0<br>5 | 5.70E+0<br>5 |  | Copz1    | 7.50E+0<br>4 | NF |  | Ptkfb4   | NF           | NF |
| Actb2    | NF           | 1.60E+0<br>7 |  | Hdac1    | 3.20E+0<br>6 | 3.30E+0<br>6 |  | Pcbp1  | NF           | 5.70E+0<br>5 |  | Ndufv2   | 4.80E+0<br>5 | NF |  | Tmed5    | 1.30E+0<br>5 | NF |
| Copa     | 1.70E+0<br>7 | 1.50E+0<br>7 |  | Psm6     | 3.80E+0<br>6 | 3.30E+0<br>6 |  | Ap5b1  | NF           | 5.70E+0<br>5 |  | Sf3b4    | NF           | NF |  | Dpf2     | NF           | NF |
| Rock1    | 1.90E+0<br>7 | 1.50E+0<br>7 |  | Actr1a   | 4.30E+0<br>6 | 3.30E+0<br>6 |  | Dock2  | 1.40E+0<br>6 | 5.60E+0<br>5 |  | Trappc3  | 5.00E+0<br>5 | NF |  | Cd2bp2   | NF           | NF |
| Eef1g    | 1.20E+0<br>7 | 1.50E+0<br>7 |  | Psm14    | 4.90E+0<br>6 | 3.20E+0<br>6 |  | Vps13c | 2.30E+0<br>5 | 5.50E+0<br>5 |  | Ncl      | 3.10E+0<br>5 | NF |  | Aldh3b1  | NF           | NF |
| Sqor     | 6.00E+0<br>6 | 1.50E+0<br>7 |  | Slc25a3  | 1.50E+0<br>6 | 3.20E+0<br>6 |  | Ndufs8 | 1.40E+0<br>7 | 5.40E+0<br>5 |  | Mcf2     | NF           | NF |  | Tapbp    | NF           | NF |
| Lsp1     | NF           | 1.50E+0<br>7 |  | Sept7    | 2.40E+0<br>6 | 3.20E+0<br>6 |  | Cd44   | NF           | 5.20E+0<br>5 |  | Mybbp1a  | 1.50E+0<br>5 | NF |  | Vwa8     | NF           | NF |
| Prdx1    | 3.70E+0<br>6 | 1.50E+0<br>7 |  | Psm1     | 4.30E+0<br>6 | 3.10E+0<br>6 |  | Ppp1ca | 1.60E+0<br>5 | 5.10E+0<br>5 |  | Ndufs2   | 2.90E+0<br>5 | NF |  | Pde4dip  | 1.60E+0<br>5 | NF |
| Rps20    | 1.00E+0<br>7 | 1.50E+0<br>7 |  | Rbm10    | 6.70E+0<br>5 | 3.10E+0<br>6 |  | Dab2   | NF           | 5.00E+0<br>5 |  | Rab1b    | 3.30E+0<br>5 | NF |  | Glg1     | 9.00E+0<br>4 | NF |
| Snrpd1   | 1.60E+0<br>7 | 1.50E+0<br>7 |  | Arpc3    | NF           | 3.10E+0<br>6 |  | Gsr    | 8.70E+0<br>5 | 4.90E+0<br>5 |  | Myo1d    | NF           | NF |  | Mrps11   | 7.50E+0<br>4 | NF |
| Psm1     | 2.60E+0<br>7 | 1.40E+0<br>7 |  | Thy1     | NF           | 3.10E+0<br>6 |  | Kif5c  | NF           | 4.90E+0<br>5 |  | Dgat1    | 3.10E+0<br>5 | NF |  | Fcgr3    | NF           | NF |
| Rpn2     | 5.80E+0<br>6 | 1.40E+0<br>7 |  | Rbbp7    | 4.10E+0<br>6 | 3.00E+0<br>6 |  | Ugp2   | NF           | 4.90E+0<br>5 |  | Tspo     | NF           | NF |  | Atad5    | 3.70E+0<br>5 | NF |
| Nt5c2    | 2.70E+0<br>7 | 1.40E+0<br>7 |  | Arf2     | 1.70E+0<br>6 | 3.00E+0<br>6 |  | Psm10  | NF           | 4.80E+0<br>5 |  | Aldh16a1 | 1.50E+0<br>5 | NF |  | Mdm4     | NF           | NF |
| Atp6v1b2 | 5.80E+0<br>6 | 1.40E+0<br>7 |  | Fau      | 9.40E+0<br>5 | 3.00E+0<br>6 |  | Dpy30  | 1.30E+0<br>6 | 4.70E+0<br>5 |  | Ftl2     | NF           | NF |  | Hydin    | NF           | NF |
| Psm7     | 1.60E+0<br>7 | 1.40E+0<br>7 |  | Lrrfip2  | 1.50E+0<br>6 | 2.90E+0<br>6 |  | Rpl9   | 3.90E+0<br>5 | 4.70E+0<br>5 |  | G3bp1    | 3.90E+0<br>5 | NF |  | Vwa5a    | NF           | NF |
| Myo1f    | 6.20E+0<br>6 | 1.40E+0<br>7 |  | Vars     | 4.10E+0<br>6 | 2.80E+0<br>6 |  | Sart3  | 2.90E+0<br>5 | 4.60E+0<br>5 |  | Arpc1b   | NF           | NF |  | Sars2    | NF           | NF |
| Rpl23    | 4.80E+0<br>6 | 1.40E+0<br>7 |  | Asph     | 1.90E+0<br>6 | 2.80E+0<br>6 |  | Tm9sf3 | 7.80E+0<br>5 | 4.60E+0<br>5 |  | Eef2     | 1.20E+0<br>5 | NF |  | Spns1    | 1.20E+0<br>5 | NF |
| Dhx57    | 3.00E+0<br>7 | 1.30E+0<br>7 |  | Efh2     | NF           | 2.80E+0<br>6 |  | Rps7   | 8.10E+0<br>5 | 4.50E+0<br>5 |  | Smarcd2  | NF           | NF |  | Card9    | NF           | NF |
| Mccc1    | 1.20E+0<br>7 | 1.30E+0<br>7 |  | Dhx38    | 4.60E+0<br>6 | 2.70E+0<br>6 |  | Plbd2  | NF           | 4.50E+0<br>5 |  | Mbd2     | 3.60E+0<br>5 | NF |  | Slc25a18 | 9.40E+0<br>4 | NF |
| Atp5h    | 1.00E+0<br>7 | 1.30E+0<br>7 |  | Bclaf1   | 7.00E+0<br>6 | 2.70E+0<br>6 |  | Mroh1  | NF           | 4.40E+0<br>5 |  | Smarcc1  | NF           | NF |  | Tmem184b | NF           | NF |
| Coro1c   | 7.20E+0<br>6 | 1.30E+0<br>7 |  | Dock8    | 2.60E+0<br>6 | 2.70E+0<br>6 |  | Ddx3x  | NF           | 4.30E+0<br>5 |  | Trappe5  | 3.70E+0<br>5 | NF |  | Tbc1d20  | NF           | NF |
| Atp5c1   | 4.90E+0<br>6 | 1.30E+0<br>7 |  | Bdh1     | 5.40E+0<br>5 | 2.70E+0<br>6 |  | Tmed9  | NF           | 4.30E+0<br>5 |  | Rps2     | NF           | NF |  | Znf639   | NF           | NF |

|          |              |              |  |               |              |              |  |          |              |              |  |          |              |    |  |         |    |    |
|----------|--------------|--------------|--|---------------|--------------|--------------|--|----------|--------------|--------------|--|----------|--------------|----|--|---------|----|----|
| Prph     | 1.20E+0<br>7 | 1.30E+0<br>7 |  | Cycl          | 1.80E+0<br>6 | 2.70E+0<br>6 |  | Elmo2    | 7.20E+0<br>5 | 4.20E+0<br>5 |  | Exoc1    | 1.50E+0<br>5 | NF |  | Comm5   | NF | NF |
| Copb1    | 1.10E+0<br>7 | 1.20E+0<br>7 |  | Lyz2          | 1.10E+0<br>6 | 2.70E+0<br>6 |  | Tubb4b   | 7.20E+0<br>5 | 4.20E+0<br>5 |  | Vps50    | 7.20E+0<br>4 | NF |  | Hprt1   | NF | NF |
| Rpn1     | 6.70E+0<br>6 | 1.20E+0<br>7 |  | Ptprc         | 1.80E+0<br>6 | 2.60E+0<br>6 |  | Mrpl12   | 1.50E+0<br>5 | 4.20E+0<br>5 |  | Setx     | NF           | NF |  | Micall1 | NF | NF |
| Siglec1  | NF           | 1.20E+0<br>7 |  | Sdhb          | 8.40E+0<br>5 | 2.60E+0<br>6 |  | Vps33a   | NF           | 4.10E+0<br>5 |  | C3       | 5.60E+0<br>5 | NF |  | Rtn3    | NF | NF |
| Pabpc1   | 7.00E+0<br>6 | 1.20E+0<br>7 |  | Fus           | 1.90E+0<br>6 | 2.50E+0<br>6 |  | Dhx15    | 4.70E+0<br>5 | 4.00E+0<br>5 |  | Rbm6     | 2.60E+0<br>5 | NF |  | Tfrc    | NF | NF |
| Myl12a   | 1.50E+0<br>6 | 1.20E+0<br>7 |  | Aifm1         | NF           | 2.50E+0<br>6 |  | Cers2    | 5.10E+0<br>5 | 4.00E+0<br>5 |  | Clns1a   | 1.90E+0<br>6 | NF |  | Ar111   | NF | NF |
| Usp15    | 1.90E+0<br>7 | 1.10E+0<br>7 |  | Tpm3          | NF           | 2.50E+0<br>6 |  | Mbd3     | 1.60E+0<br>5 | 3.90E+0<br>5 |  | Eif1ax   | 1.90E+0<br>6 | NF |  | Akap13  | NF | NF |
| Psmc3    | 9.70E+0<br>6 | 1.10E+0<br>7 |  | Uqcr1         | NF           | 2.50E+0<br>6 |  | Slc39a7  | NF           | 3.90E+0<br>5 |  | Sh3bgrl2 | 1.20E+0<br>6 | NF |  | S100a4  | NF | NF |
| Lcp1     | 1.10E+0<br>7 | 1.10E+0<br>7 |  | Scyl2         | 2.10E+0<br>6 | 2.40E+0<br>6 |  | Mpc2     | NF           | 3.90E+0<br>6 |  | Snrpd2   | 2.10E+0<br>6 | NF |  | Lrch4   | NF | NF |
| Ddost    | 7.50E+0<br>6 | 1.10E+0<br>7 |  | Snrpb         | 2.70E+0<br>6 | 2.40E+0<br>6 |  | Adgrl1   | NF           | 3.90E+0<br>5 |  | Vapa     | 8.80E+0<br>5 | NF |  | Ttl3    | NF | NF |
| Psma2    | 1.00E+0<br>7 | 1.10E+0<br>7 |  | Copg2         | 9.60E+0<br>5 | 2.40E+0<br>6 |  | Acap2    | NF           | 3.80E+0<br>5 |  | Dhx36    | 8.50E+0<br>5 | NF |  | Gba2    | NF | NF |
| Cap1     | 3.50E+0<br>6 | 1.10E+0<br>7 |  | Atp2a2        | 1.40E+0<br>6 | 2.30E+0<br>6 |  | Akap8    | 3.80E+0<br>5 | 3.80E+0<br>5 |  | Zfp58    | 3.30E+0<br>6 | NF |  | Rps25   | NF | NF |
| Arl8b    | 1.20E+0<br>7 | 1.10E+0<br>7 |  | Snrpd3        | 4.80E+0<br>6 | 2.30E+0<br>6 |  | Lnpep    | 8.20E+0<br>5 | 3.60E+0<br>5 |  | Ahnak    | 5.50E+0<br>5 | NF |  | Top2a   | NF | NF |
| Actr2    | NF           | 1.10E+0<br>7 |  | Apobr         | 7.20E+0<br>5 | 2.30E+0<br>6 |  | Sept11   | NF           | 3.60E+0<br>5 |  | Serbp1   | 3.70E+0<br>5 | NF |  | Lgals2  | NF | NF |
| Hist1h4a | 2.30E+0<br>6 | 1.10E+0<br>7 |  | Ddb1          | 4.00E+0<br>6 | 2.20E+0<br>6 |  | Acaca    | 3.80E+0<br>5 | 3.50E+0<br>5 |  | Usp11    | 1.30E+0<br>6 | NF |  | Ap3b1   | NF | NF |
| Prmt5    | 3.30E+0<br>7 | 1.10E+0<br>7 |  | Eif3i         | 4.40E+0<br>6 | 2.20E+0<br>6 |  | Rps19    | 2.60E+0<br>5 | 3.50E+0<br>5 |  | Spin2c   | 6.30E+0<br>5 | NF |  |         |    |    |
| S100a11  | 5.50E+0<br>6 | 1.10E+0<br>7 |  | Trpv2         | 1.60E+0<br>6 | 2.20E+0<br>6 |  | Arpc51   | NF           | 3.50E+0<br>5 |  | Rpl10    | 2.70E+0<br>5 | NF |  |         |    |    |
| Psm2     | 1.20E+0<br>7 | 1.00E+0<br>7 |  | Hist1h2b<br>k | NF           | 2.20E+0<br>6 |  | Slc25a12 | 9.30E+0<br>4 | 3.30E+0<br>5 |  | Psmb9    | 2.10E+0<br>5 | NF |  |         |    |    |
| Copb2    | 9.30E+0<br>6 | 1.00E+0<br>7 |  | Dnaja1        | 7.70E+0<br>5 | 2.20E+0<br>6 |  | Otud4    | 1.10E+0<br>6 | 3.10E+0<br>5 |  | Akap5    | 8.60E+0<br>6 | NF |  |         |    |    |
| Psmc1    | 1.40E+0<br>7 | 1.00E+0<br>7 |  | Lonp1         | 4.00E+0<br>6 | 2.10E+0<br>6 |  | Nsflc    | 6.80E+0<br>5 | 3.10E+0<br>5 |  | Mre11    | 2.50E+0<br>5 | NF |  |         |    |    |
| Morc3    | 1.40E+0<br>7 | 1.00E+0<br>7 |  | Sfxn3         | NF           | 2.10E+0<br>6 |  | Ugt1a2   | NF           | 3.10E+0<br>5 |  | Ywhae    | 6.40E+0<br>5 | NF |  |         |    |    |
| Chi14    | 3.20E+0<br>6 | 1.00E+0<br>7 |  | Atp5d         | 1.60E+0<br>6 | 2.10E+0<br>6 |  | C1qbp    | 3.90E+0<br>5 | 3.00E+0<br>5 |  | Ndufa5   | 4.90E+0<br>5 | NF |  |         |    |    |
| Anapc1   | NF           | 1.00E+0<br>7 |  | Ttc7a         | 3.60E+0<br>6 | 2.00E+0<br>6 |  | Cyfp2    | NF           | 3.00E+0<br>5 |  | Atp1b3   | 3.10E+0<br>5 | NF |  |         |    |    |
| Psmc5    | 1.60E+0<br>7 | 9.90E+0<br>6 |  | Eif3d         | 3.30E+0<br>6 | 2.00E+0<br>6 |  | Naca     | NF           | 2.90E+0<br>5 |  | Synj1    | NF           | NF |  |         |    |    |



|       |          |          |  |          |          |          |  |         |          |          |  |         |          |    |  |  |  |
|-------|----------|----------|--|----------|----------|----------|--|---------|----------|----------|--|---------|----------|----|--|--|--|
| Cfl1  | 8.00E+06 | 9.80E+06 |  | Unc93b1  | 2.30E+06 | 2.00E+06 |  | Mta2    | 8.50E+05 | 2.70E+05 |  | Eif2ak3 | 5.70E+05 | NF |  |  |  |
| Copg1 | 1.10E+07 | 9.70E+06 |  | Atp6v1c1 | NF       | 2.00E+06 |  | Sf3b3   | NF       | 2.60E+05 |  | Arf4    | 1.80E+06 | NF |  |  |  |
| Synj1 | 5.10E+06 | 9.60E+06 |  | Dhrs7b   | 4.10E+05 | 2.00E+06 |  | Trappc8 | NF       | 2.60E+05 |  | Arpc5   | NF       | NF |  |  |  |
| Ipo8  | 1.20E+07 | 9.40E+06 |  | Diaph1   | 1.50E+06 | 1.90E+06 |  | Nbeal2  | NF       | 2.60E+05 |  | Atxn7l3 | NF       | NF |  |  |  |
| Ckap5 | 6.70E+06 | 9.30E+06 |  | Cope     | 1.50E+06 | 1.90E+06 |  | Fam45a  | NF       | 2.50E+05 |  | Hbb-b1  | NF       | NF |  |  |  |
| Plec  | 5.00E+05 | 9.00E+06 |  | Atp1a1   | 3.60E+05 | 1.90E+06 |  | Arhgap9 | NF       | 2.40E+05 |  | P2rx4   | 2.00E+05 | NF |  |  |  |
| Psmb2 | 5.20E+06 | 9.00E+06 |  | Ndufs1   | 1.90E+06 | 1.80E+06 |  | Cops4   | NF       | 2.40E+05 |  | Pigk    | 2.30E+05 | NF |  |  |  |
| Myo1f | 4.30E+06 | 8.90E+06 |  | Acly     | 4.00E+05 | 1.80E+06 |  | Cdc37   | 1.20E+05 | 2.30E+05 |  | Tmem33  | 3.70E+05 | NF |  |  |  |
| Calm2 | 3.70E+06 | 8.90E+06 |  | Dctn1    | 1.10E+06 | 1.80E+06 |  | Ctsa    | 5.10E+05 | 2.20E+05 |  | Ccdc130 | NF       | NF |  |  |  |
| Rps16 | 8.70E+06 | 8.80E+06 |  | Psmd10   | 1.10E+06 | 1.80E+06 |  | Ipo7    | 8.40E+04 | 2.20E+05 |  | Capza1  | 6.00E+05 | NF |  |  |  |

**Table S6: Sum intensities of mass-spectrometry targets for empty and FL4**

Representative analysis of proteins pulled down after flag purification of JAWSII cells expressing either empty vector or Flag-tagged FL4 fragment. NF= Not Found.
